# Supplementary material
Source: ML conference proceedings conference paper supplement (https://openreview.net/forum?id=gdegUuC_fxR)
Supplement: supplementary_material [file attachment]

## A ADDITIONAL NOTATIONS

We introduce a few notations that are used in the main text as well as some proof. When  $\nabla f$  is  $L$ -Lipschitz, the drift term  $\begin{bmatrix} \mathbf{p} - \alpha \nabla f(\mathbf{q}) \\ -\gamma \mathbf{p} - \nabla f(\mathbf{q}) \end{bmatrix}$  in HFHR dynamics is also  $L'$ -Lipschitz, as proved in Lemma D.3, where

$$L' = \sqrt{2} \max \left\{ \sqrt{1 + \alpha^2} \max \left\{ \frac{1}{\sqrt{2}}, L \right\}, \sqrt{1 + \gamma^2} \right\}.$$

We show in Lemma D.5 that a linear-transformed HFHR dynamics satisfies the nice contraction property, the linear transformation  $P$  we use is defined as

$$P = \begin{bmatrix} \gamma I & I \\ 0 & \sqrt{1 + \alpha\gamma} I \end{bmatrix} \in \mathbb{R}^{2d \times 2d}.$$

Denote the largest and the smallest singular value of  $P$  by

$$\begin{aligned} \sigma_{\max} &= \sqrt{\frac{\alpha\gamma}{2} + \frac{\gamma^2}{2} + \frac{\sqrt{\alpha^2\gamma^2 - 2\alpha\gamma^3 + 4\alpha\gamma + \gamma^4 + 4}}{2}} + 1, \\ \sigma_{\min} &= \sqrt{\frac{\alpha\gamma}{2} + \frac{\gamma^2}{2} - \frac{\sqrt{\alpha^2\gamma^2 - 2\alpha\gamma^3 + 4\alpha\gamma + \gamma^4 + 4}}{2}} + 1 \end{aligned}$$

and its condition number by

$$\kappa' = \frac{\sigma_{\max}}{\sigma_{\min}} = \sqrt{\frac{\frac{\alpha\gamma}{2} + \frac{\gamma^2}{2} + \frac{\sqrt{\alpha^2\gamma^2 - 2\alpha\gamma^3 + 4\alpha\gamma + \gamma^4 + 4}}{2} + 1}{\frac{\alpha\gamma}{2} + \frac{\gamma^2}{2} - \frac{\sqrt{\alpha^2\gamma^2 - 2\alpha\gamma^3 + 4\alpha\gamma + \gamma^4 + 4}}{2} + 1}}.$$

The rate  $\lambda'$  of exponential convergence of transformed HFHR dynamics is characterized in Lemma D.5 and is defined as

$$\lambda' = \min \left\{ \frac{m}{\gamma} + \alpha m, \frac{\gamma^2 - L}{\gamma} \right\}$$

given that  $\gamma^2 > L$ .

## B PROOFS FOR THE CONTINUOUS DYNAMICS

*Notations and definitions can be found in Sec.3.*

### B.1 PROOF OF THEOREM 4.1

*Proof.* The Fokker-Plank equation of HFHR is given by

$$\partial_t \rho_t = -\nabla_{\mathbf{x}} \cdot \left( \begin{bmatrix} \mathbf{p} \\ -\nabla f(\mathbf{q}) \end{bmatrix} \rho_t \right) + \alpha (\nabla_{\mathbf{q}} \cdot (\nabla f(\mathbf{q}) \rho_t) + \Delta_{\mathbf{q}} \rho_t) + \gamma (\nabla_{\mathbf{p}} \cdot (\mathbf{p} \rho_t) + \Delta_{\mathbf{p}} \rho_t)$$

where  $\nabla_{\mathbf{x}} = (\nabla_{\mathbf{q}}, \nabla_{\mathbf{p}})$ . For  $\pi \propto e^{-f(\mathbf{q}) - \frac{1}{2}\|\mathbf{p}\|^2}$ , we have

$$\begin{aligned} \nabla_{\mathbf{x}} \cdot \left( \begin{bmatrix} \mathbf{p} \\ -\nabla f(\mathbf{q}) \end{bmatrix} \pi \right) &= \langle \begin{bmatrix} \mathbf{p} \\ -\nabla f(\mathbf{q}) \end{bmatrix}, \nabla_{\mathbf{x}} \pi \rangle = 0, \\ \Delta_{\mathbf{q}} \pi &= -\nabla_{\mathbf{q}} \cdot (\pi \nabla f(\mathbf{q})) \\ \Delta_{\mathbf{p}} \pi &= -\nabla_{\mathbf{p}} \cdot (\pi \mathbf{p}) \end{aligned}$$

Therefore  $\partial_t \pi = 0$  and hence  $\pi$  is the invariant distribution of HFHR.  $\square$

## B.2 PROOF OF THEOREM 5.1

*Proof.* Consider two copies of HFHR that are driven by the same Brownian motion

$$\begin{cases} d\mathbf{q}_t = (\mathbf{p}_t - \alpha \nabla f(\mathbf{q}_t))dt + \sqrt{2\alpha}d\mathbf{B}_t^1 \\ d\mathbf{p}_t = (-\gamma\mathbf{p}_t - \nabla f(\mathbf{q}_t))dt + \sqrt{2\gamma}d\mathbf{B}_t^2 \end{cases}, \quad \begin{cases} d\tilde{\mathbf{q}}_t = (\tilde{\mathbf{p}}_t - \alpha \nabla f(\tilde{\mathbf{q}}_t))dt + \sqrt{2\alpha}d\mathbf{B}_t^1 \\ d\tilde{\mathbf{p}}_t = (-\gamma\tilde{\mathbf{p}}_t - \nabla f(\tilde{\mathbf{q}}_t))dt + \sqrt{2\gamma}d\mathbf{B}_t^2 \end{cases},$$

where we set  $(\tilde{\mathbf{q}}_0, \tilde{\mathbf{p}}_0) \sim \pi$ ,  $\mathbf{p}_0 = \tilde{\mathbf{p}}_0$  and  $\mathbf{q}_0$  such that

$$W_2^2(\mu_0, \mu) = \mathbb{E} \left[ \|\mathbf{q}_0 - \tilde{\mathbf{q}}_0\|_2^2 \right], \quad \mathbf{q}_0 \sim \mu_0$$

Denote  $\begin{bmatrix} \phi_t \\ \psi_t \end{bmatrix} = P \begin{bmatrix} \mathbf{q}_t - \tilde{\mathbf{q}}_t \\ \mathbf{p}_t - \tilde{\mathbf{p}}_t \end{bmatrix}$  where  $P$  is defined in Appendix A. By Lemma D.5 and the assumption on  $\alpha, \gamma$ , we have

$$\left\| \begin{bmatrix} \phi_t \\ \psi_t \end{bmatrix} \right\|^2 \leq e^{-2(\frac{m}{\gamma} + m\alpha)t} \left\| \begin{bmatrix} \phi_0 \\ \psi_0 \end{bmatrix} \right\|^2.$$

Therefore we obtain

$$\begin{aligned} W_2^2(\mu_t, \mu) &= \inf_{(\mathbf{q}_t, \tilde{\mathbf{q}}_t) \sim \Pi(\mu_t, \mu)} \mathbb{E} \|\mathbf{q}_t - \tilde{\mathbf{q}}_t\|^2 \\ &\leq \inf_{(\mathbf{q}_t, \tilde{\mathbf{q}}_t) \sim \Pi(\mu_t, \mu), (\mathbf{p}_t, \tilde{\mathbf{p}}_t) \sim \Pi(\nu_t, \nu)} \mathbb{E} \left\| \begin{bmatrix} \mathbf{q}_t - \tilde{\mathbf{q}}_t \\ \mathbf{p}_t - \tilde{\mathbf{p}}_t \end{bmatrix} \right\|^2 \\ &\leq \mathbb{E} \|P^{-1}\|_2^2 \left\| \begin{bmatrix} \phi_t \\ \psi_t \end{bmatrix} \right\|^2 \\ &\leq \mathbb{E} \|P^{-1}\|_2^2 e^{-2(\frac{m}{\gamma} + m\alpha)t} \left\| \begin{bmatrix} \phi_0 \\ \psi_0 \end{bmatrix} \right\|^2 \\ &\leq (\kappa')^2 e^{-2(\frac{m}{\gamma} + m\alpha)t} \left\| \begin{bmatrix} \mathbf{q}_0 - \tilde{\mathbf{q}}_0 \\ \mathbf{p}_0 - \tilde{\mathbf{p}}_0 \end{bmatrix} \right\|^2 \\ &= (\kappa')^2 e^{-2(\frac{m}{\gamma} + m\alpha)t} W_2^2(\mu_0, \mu) \end{aligned}$$

Taking square root yields the desired result.  $\square$

## C ARBITRARY LONG TIME DISCRETIZATION ERROR OF ALGORITHM 1

**Theorem C.1.** *Under Conditions A1 and further assume the function  $\nabla \Delta f$  grows at most linearly, i.e.,  $\|\nabla \Delta f(\mathbf{q})\| \leq G\sqrt{1 + \|\mathbf{q}\|^2}$ ,  $\forall \mathbf{q} \in \mathbb{R}^d$ . Also suppose  $\gamma$  in HFHR dynamics satisfy  $\gamma^2 > L$ . Then there exist  $C, h_0 > 0$ , such that for  $0 < h \leq h_0$ , we have*

$$\left( \mathbb{E} \|\mathbf{x}_k - \bar{\mathbf{x}}_k\|^2 \right)^{\frac{1}{2}} \leq Ch$$

where  $\bar{\mathbf{x}}_k$  is the  $k$ -th iterate of Algorithm 1 with step size  $h$  starting from  $\mathbf{x}_0$ ,  $\mathbf{x}_k$  is the solution of HFHR dynamics at time  $kh$ , starting from  $\mathbf{x}_0$ . This result holds uniformly for all  $k \geq 0$  and  $k$  can go to  $\infty$ . In particular,  $C = \mathcal{O}(\sqrt{d})$  and if  $\gamma - \frac{L+m}{\gamma} \geq m\alpha$ , then there exists  $b > 0$ , independent of  $\alpha$  and is of order  $\mathcal{O}(\sqrt{d})$ , such that

$$C \leq \frac{b}{m} \left( \alpha^2 - \frac{\alpha}{\gamma} + \frac{1}{\gamma^2} \right). \quad (11)$$

*Proof.* Denote  $t_k = kh$ , the solution of the HFHR dynamics at time  $t$  by  $\mathbf{x}_{0, \mathbf{x}_0}(t)$ , the  $k$ -th iterates of the Strang's splitting method of HFHR dynamics by  $\bar{\mathbf{x}}_{0, \mathbf{x}_0}(kh)$ . Both  $\mathbf{x}_{0, \mathbf{x}_0}(t)$  and  $\bar{\mathbf{x}}_{0, \mathbf{x}_0}(kh)$

start from the same initial value  $\mathbf{x}_0$ . The linear transformation  $P$  defined in Appendix A, transforms the solution of HFHR dynamics into  $\mathbf{y}_{0,P\mathbf{x}_0}(t) = P\mathbf{x}_{0,\mathbf{x}_0}(t)$  and the Strang's splitting discretization of HFHR into  $\bar{\mathbf{y}}_{0,P\mathbf{x}_0}(t) = P\bar{\mathbf{x}}_{0,\mathbf{x}_0}(t)$ .

For the ease of notation, we write  $\mathbf{y}_{0,\mathbf{y}_0}(t_k)$  as  $\mathbf{y}_k$  and  $\bar{\mathbf{y}}_{0,\mathbf{y}_0}(t_k)$  as  $\bar{\mathbf{y}}_k$ . We have the following identity

$$\begin{aligned}\mathbb{E}\|\mathbf{y}_{k+1} - \bar{\mathbf{y}}_{k+1}\|^2 &= \mathbb{E}\|\mathbf{y}_{t_k,\mathbf{y}_k}(h) - \bar{\mathbf{y}}_{t_k,\bar{\mathbf{y}}_k}(h)\|^2 \\ &= \mathbb{E}\|\mathbf{y}_{t_k,\mathbf{y}_k}(h) - \mathbf{y}_{t_k,\bar{\mathbf{y}}_k}(h) + \mathbf{y}_{t_k,\bar{\mathbf{y}}_k}(h) - \bar{\mathbf{y}}_{t_k,\bar{\mathbf{y}}_k}(h)\|^2 \\ &= \underbrace{\mathbb{E}\|\mathbf{y}_{t_k,\mathbf{y}_k}(h) - \mathbf{y}_{t_k,\bar{\mathbf{y}}_k}(h)\|^2}_{\textcircled{1}} + \underbrace{\mathbb{E}\|\mathbf{y}_{t_k,\bar{\mathbf{y}}_k}(h) - \bar{\mathbf{y}}_{t_k,\bar{\mathbf{y}}_k}(h)\|^2}_{\textcircled{2}} \\ &\quad + 2 \underbrace{\mathbb{E}\langle \mathbf{y}_{t_k,\mathbf{y}_k}(h) - \mathbf{y}_{t_k,\bar{\mathbf{y}}_k}(h), \mathbf{y}_{t_k,\bar{\mathbf{y}}_k}(h) - \bar{\mathbf{y}}_{t_k,\bar{\mathbf{y}}_k}(h) \rangle}_{\textcircled{3}}\end{aligned}$$

By Lemma D.5, when  $0 < h < \frac{1}{2\lambda'}$ , term  $\textcircled{1}$  can be upper bounded as

$$\begin{aligned}\mathbb{E}\|\mathbf{y}_{t_k,\mathbf{y}_k}(h) - \mathbf{y}_{t_k,\bar{\mathbf{y}}_k}(h)\|^2 &\leq e^{-2\lambda'h} \mathbb{E}\|\mathbf{y}_k - \bar{\mathbf{y}}_k\|^2 \\ &\leq (1 - 2\lambda'h + 2(\lambda')^2 h^2) \mathbb{E}\|\mathbf{y}_k - \bar{\mathbf{y}}_k\|^2 \\ &\leq (1 - \lambda'h) \mathbb{E}\|\mathbf{y}_k - \bar{\mathbf{y}}_k\|^2\end{aligned}$$

where the second inequality is due to  $e^{-x} \leq 1 - x + \frac{x^2}{2}, \forall x > 0$ .

For term  $\textcircled{2}$ , we have by Lemma D.8 that

$$\mathbb{E}\|\mathbf{y}_{t_k,\bar{\mathbf{y}}_k}(h) - \bar{\mathbf{y}}_{t_k,\bar{\mathbf{y}}_k}(h)\|^2 \leq \sigma_{\max}^2 \mathbb{E}\|\mathbf{x}_{t_k,\bar{\mathbf{x}}_k}(h) - \bar{\mathbf{x}}_{t_k,\bar{\mathbf{x}}_k}(h)\|^2 \leq \sigma_{\max}^2 C_2^2 h^3$$

where  $\sigma_{\max}$  is the largest singular value of matrix  $P$ .

For term  $\textcircled{3}$ , we have by Lemma D.1 that

$$\begin{aligned}&2\mathbb{E}\langle \mathbf{y}_{t_k,\mathbf{y}_k}(h) - \mathbf{y}_{t_k,\bar{\mathbf{y}}_k}(h), \mathbf{y}_{t_k,\bar{\mathbf{y}}_k}(h) - \bar{\mathbf{y}}_{t_k,\bar{\mathbf{y}}_k}(h) \rangle \\ &= 2\mathbb{E}\langle \mathbf{y}_k - \bar{\mathbf{y}}_k + \mathbf{z}, \mathbf{y}_{t_k,\bar{\mathbf{y}}_k}(h) - \bar{\mathbf{y}}_{t_k,\bar{\mathbf{y}}_k}(h) \rangle \\ &= 2\mathbb{E}\underbrace{\langle \mathbf{y}_k - \bar{\mathbf{y}}_k, \mathbf{y}_{t_k,\bar{\mathbf{y}}_k}(h) - \bar{\mathbf{y}}_{t_k,\bar{\mathbf{y}}_k}(h) \rangle}_{\textcircled{3a}} + 2\mathbb{E}\underbrace{\langle \mathbf{z}, \mathbf{y}_{t_k,\bar{\mathbf{y}}_k}(h) - \bar{\mathbf{y}}_{t_k,\bar{\mathbf{y}}_k}(h) \rangle}_{\textcircled{3b}}\end{aligned}$$

For term (3a), by the tower property of conditional expectation, we have

$$\begin{aligned}
2\mathbb{E} \left\langle \mathbf{y}_k - \bar{\mathbf{y}}_k, \mathbf{y}_{t_k, \bar{\mathbf{y}}_k}(h) - \bar{\mathbf{y}}_{t_k, \bar{\mathbf{y}}_k}(h) \right\rangle &= 2\mathbb{E} \left[ \mathbb{E} \left[ \left\langle \mathbf{y}_k - \bar{\mathbf{y}}_k, \mathbf{y}_{t_k, \bar{\mathbf{y}}_k}(h) - \bar{\mathbf{y}}_{t_k, \bar{\mathbf{y}}_k}(h) \right\rangle \middle| \mathcal{F}_k \right] \right] \\
&= 2\mathbb{E} \left\langle \mathbf{y}_k - \bar{\mathbf{y}}_k, \mathbb{E} \left[ \mathbf{y}_{t_k, \bar{\mathbf{y}}_k}(h) - \bar{\mathbf{y}}_{t_k, \bar{\mathbf{y}}_k}(h) \middle| \mathcal{F}_k \right] \right\rangle \\
&\leq 2\sqrt{\mathbb{E} \|\mathbf{y}_k - \bar{\mathbf{y}}_k\|^2} \sqrt{\mathbb{E} \left\| \mathbb{E} \left[ \mathbf{y}_{t_k, \bar{\mathbf{y}}_k}(h) - \bar{\mathbf{y}}_{t_k, \bar{\mathbf{y}}_k}(h) \middle| \mathcal{F}_k \right] \right\|^2} \\
&\leq 2\sqrt{\mathbb{E} \|\mathbf{y}_k - \bar{\mathbf{y}}_k\|^2} \sqrt{\sigma_{\max}^2 \mathbb{E} \left\| \mathbb{E} \left[ \mathbf{x}_{t_k, \bar{\mathbf{x}}_k}(h) - \bar{\mathbf{x}}_{t_k, \bar{\mathbf{x}}_k}(h) \middle| \mathcal{F}_k \right] \right\|^2} \\
&\leq 2\sqrt{\mathbb{E} \|\mathbf{y}_k - \bar{\mathbf{y}}_k\|^2} \sqrt{\sigma_{\max}^2 C_1^2 h^4} \\
&\leq 2\sigma_{\max} C_1 \sqrt{\mathbb{E} \|\mathbf{y}_k - \bar{\mathbf{y}}_k\|^2} h^2.
\end{aligned}$$

For term (3b), when  $0 < h < \frac{1}{4L''}$  we have by Lemma D.1 and Lemma D.8

$$\begin{aligned}
2\mathbb{E} \left\langle \mathbf{z}, \mathbf{y}_{t_k, \bar{\mathbf{y}}_k}(h) - \bar{\mathbf{y}}_{t_k, \bar{\mathbf{y}}_k}(h) \right\rangle &\leq 2\sqrt{\mathbb{E} \|\mathbf{z}\|^2} \sqrt{\mathbb{E} \left\| \mathbf{y}_{t_k, \bar{\mathbf{y}}_k}(h) - \bar{\mathbf{y}}_{t_k, \bar{\mathbf{y}}_k}(h) \right\|^2} \\
&= 2\sqrt{\mathbb{E} \|\mathbf{z}\|^2} \sqrt{\mathbb{E} \left[ \mathbb{E} \left[ \left\| \mathbf{y}_{t_k, \bar{\mathbf{y}}_k}(h) - \bar{\mathbf{y}}_{t_k, \bar{\mathbf{y}}_k}(h) \right\|^2 \middle| \mathcal{F}_k \right] \right]} \\
&= 2\sqrt{\mathbb{E} \|\mathbf{z}\|^2} \sqrt{\sigma_{\max}^2 \mathbb{E} \left[ \mathbb{E} \left[ \left\| \mathbf{x}_{t_k, \bar{\mathbf{x}}_k}(h) - \bar{\mathbf{x}}_{t_k, \bar{\mathbf{x}}_k}(h) \right\|^2 \middle| \mathcal{F}_k \right] \right]} \\
&\leq 2\sigma_{\max} \sqrt{\tilde{C} \mathbb{E} \|\mathbf{y}_k - \bar{\mathbf{y}}_k\|^2} h^2 \sqrt{C_2^2 h^3} \\
&\leq 2\sigma_{\max} C_2 \sqrt{\tilde{C}} \sqrt{\mathbb{E} \|\mathbf{y}_k - \bar{\mathbf{y}}_k\|^2} h^{\frac{5}{2}}
\end{aligned}$$

where  $\tilde{C} = 2(L'')^2 = 2(\kappa')^2 (L')^2$  is from Lemma D.1 and Lemma D.3.

Recall both  $C_1$  and  $C_2$  depend on  $\|\mathbf{x}_k\|$  and we would like to upper bound this term. To this end, consider  $\tilde{\mathbf{x}}(t)$ , a solution of HFHR dynamics with initial value  $\tilde{\mathbf{x}}_0$  that follows the invariant distribution  $\tilde{\mathbf{x}}_0 \sim \pi$  and realizes  $W_2(\pi_0, \pi)$ , i.e.,  $\mathbb{E} \|\tilde{\mathbf{x}}_0 - \mathbf{x}_0\|^2 = W_2^2(\pi_0, \pi)$ .

Denote  $\tilde{\mathbf{x}}_k = \tilde{\mathbf{x}}(kh)$  and  $e_k = \left(\mathbb{E}\|\mathbf{y}_k - \bar{\mathbf{y}}_k\|^2\right)^{\frac{1}{2}}$ , we then have

$$\begin{aligned}
\mathbb{E}\|\bar{\mathbf{x}}_k\|^2 &= \mathbb{E}\|\mathbf{x}_k + \bar{\mathbf{x}}_k - \mathbf{x}_k\|^2 \\
&\leq 2\mathbb{E}\|\mathbf{x}_k\|^2 + 2\mathbb{E}\|\bar{\mathbf{x}}_k - \mathbf{x}_k\|^2 \\
&\leq 4\mathbb{E}\|\tilde{\mathbf{x}}_k\|^2 + 4\mathbb{E}\|\tilde{\mathbf{x}}_k - \mathbf{x}_k\|^2 + 2\mathbb{E}\|\bar{\mathbf{x}}_k - \mathbf{x}_k\|^2 \\
&= 4\mathbb{E}\|\tilde{\mathbf{x}}_k\|^2 + 4\mathbb{E}\left\|P^{-1}P(\tilde{\mathbf{x}}_k - \mathbf{x}_k)\right\|^2 + 2\mathbb{E}\left\|P^{-1}P(\bar{\mathbf{x}}_k - \mathbf{x}_k)\right\|^2 \\
&\leq 4\left(\int_{\mathbb{R}^d}\|\mathbf{q}\|^2 d\mu + d\right) + \frac{4}{\sigma_{\min}^2}\mathbb{E}\|P(\tilde{\mathbf{x}}_k - \mathbf{x}_k)\|^2 + \frac{2}{\sigma_{\min}^2}\mathbb{E}\|\bar{\mathbf{y}}_k - \mathbf{y}_k\|^2 \\
&\stackrel{(i)}{\leq} 4\left(\int_{\mathbb{R}^d}\|\mathbf{q}\|^2 d\mu + d\right) + \frac{4}{\sigma_{\min}^2}e^{-2\lambda'kh}\mathbb{E}\|P(\tilde{\mathbf{x}}_0 - \mathbf{x}_0)\|^2 + \frac{2}{\sigma_{\min}^2}e_k^2 \\
&\leq 4\left(\int_{\mathbb{R}^d}\|\mathbf{q}\|^2 d\mu + d\right) + 4\kappa^2 W_2^2(\pi_0, \pi) + \frac{2}{\sigma_{\min}^2}e_k^2 \\
&\triangleq Fe_k^2 + G
\end{aligned}$$

where (i) is due to Lemma D.5. Recall from Lemma D.8, we have

$$\begin{aligned}
C_1 &\leq A_1\sqrt{\mathbb{E}\|\bar{\mathbf{x}}_k\|^2} + B_1 \leq A_1\sqrt{F}e_k + (A_1\sqrt{G} + B_1) \triangleq U_1e_k + V_1 \\
C_2 &\leq A_2\sqrt{\mathbb{E}\|\bar{\mathbf{x}}_k\|^2} + B_2 \leq A_2\sqrt{F}e_k + (A_2\sqrt{G} + B_2) \triangleq U_2e_k + V_2
\end{aligned}$$

where

$$\begin{aligned}
A_1 &= (L + G) \max\{\alpha + 1.25, \gamma + 1\}(1.74 + 0.71\alpha) \\
B_1 &= (L + G) \max\{\alpha + 1.25, \gamma + 1\} \left[0.5\alpha + (1.26\sqrt{\alpha} + 1.14\alpha\sqrt{\alpha} + 2.32\sqrt{\gamma})\sqrt{hd}\right] \\
A_2 &= L \max\{\alpha + 1.25, \gamma + 1\}(1.92 + 2.30\alpha L)\sqrt{h} \\
B_2 &= L \max\{\alpha + 1.25, \gamma + 1\}(2.60\sqrt{\alpha} + 3.34\sqrt{\gamma}h)\sqrt{d}
\end{aligned}$$

Combine the above and bounds for terms (1), (2), (3a) and (3b), we then obtain

$$\begin{aligned}
e_{k+1}^2 &\leq (1 - \lambda' h) e_k^2 + \sigma_{\max}^2 C_2^2 h^3 + 2\sigma_{\max} C_1 e_k h^2 + 2\sigma_{\max} C_2 \sqrt{\tilde{C}} e_k h^{\frac{5}{2}} \\
&\leq (1 - \lambda' h) e_k^2 + \sigma_{\max}^2 2(U_2^2 e_k^2 + V_2^2) h^3 + 2\sigma_{\max} (U_1 e_k + V_1) e_k h^2 + 2\sigma_{\max} (U_2 e_k + V_2) \sqrt{\tilde{C}} e_k h^{\frac{5}{2}} \\
&= \left( 1 - \lambda' h + 2\sigma_{\max}^2 U_2^2 h^3 + 2\sigma_{\max} U_1 h^2 + 2\sigma_{\max} U_2 \sqrt{\tilde{C}} h^{\frac{5}{2}} \right) e_k^2 \\
&\quad + \left( 2\sigma_{\max} V_1 + 2\sigma_{\max} V_2 \sqrt{\tilde{C}} h \right) e_k h^2 + 2\sigma_{\max}^2 V_2^2 h^3 \\
&\leq \left( 1 - \lambda' h + 2\sigma_{\max}^2 U_2^2 h^3 + 2\sigma_{\max} U_1 h^2 + 2\sigma_{\max} U_2 \sqrt{\tilde{C}} h^{\frac{5}{2}} \right) e_k^2 + \frac{\lambda'}{8} h e_k^2 \\
&\quad + \frac{2 \left( 2\sigma_{\max} V_1 + 2\sigma_{\max} V_2 \sqrt{\tilde{C}} h \right)^2}{\lambda'} h^3 + 2\sigma_{\max}^2 V_2^2 h^3 \\
&= \left( 1 - \frac{7}{8} \lambda' h + 2\sigma_{\max}^2 U_2^2 h^3 + 2\sigma_{\max} U_1 h^2 + 2\sigma_{\max} U_2 \sqrt{\tilde{C}} h^{\frac{5}{2}} \right) e_k^2 \\
&\quad + \left( \frac{2 \left( 2\sigma_{\max} V_1 + 2\sigma_{\max} V_2 \sqrt{\tilde{C}} h \right)^2}{\lambda'} + 2\sigma_{\max}^2 V_2^2 \right) h^3 \\
&\stackrel{(i)}{\leq} \left( 1 - \frac{1}{2} \lambda' h \right) e_k^2 + \left( \frac{2 \left( 2\sigma_{\max} V_1 + 2\sigma_{\max} V_2 \sqrt{\tilde{C}} h \right)^2}{\lambda'} + 2\sigma_{\max}^2 V_2^2 \right) h^3 \\
&\triangleq \left( 1 - \frac{1}{2} \lambda' h \right) e_k^2 + K h^3
\end{aligned}$$

where (i) is due to  $h < \min\{h_1, h_2, h_3\}$  and

$$\begin{aligned}
h_1 &= \frac{\sqrt{\lambda'}}{4\sqrt{2}\kappa' L \max\{\alpha + 1.25, \gamma + 1\}(1.92 + 2.30\alpha L)}, \\
h_2 &= \frac{\lambda'}{16\sqrt{2}\kappa'(L + G) \max\{\alpha + 1.25, \gamma + 1\}(1.74 + 0.71\alpha)}, \\
h_3 &= \frac{\lambda'}{8\kappa' L \max\{\alpha + 1.25, \gamma + 1\}(1.92 + 2.30\alpha L)}.
\end{aligned}$$

Unfolding the above inequality, we arrive at

$$\begin{aligned}
e_k^2 &\leq \left( 1 - \frac{\lambda'}{2} h \right)^k e_0^2 + \left( 1 + \left( 1 - \frac{\lambda'}{2} h \right) + \cdots + \left( 1 - \frac{\lambda'}{2} h \right)^{k-1} \right) K h^3 \\
&\stackrel{(i)}{\leq} K h^3 \sum_{i=0}^{\infty} \left( 1 - \frac{\lambda'}{2} h \right)^i \\
&= \frac{2K}{\lambda'} h^2
\end{aligned}$$

where (i) is due to  $e_k = 0$ . Therefore

$$\left( \mathbb{E} \|\mathbf{x}_k - \bar{\mathbf{x}}_k\|^2 \right)^{\frac{1}{2}} = \left( \mathbb{E} \left\| P^{-1}(\mathbf{y}_k - \bar{\mathbf{y}}_k) \right\|^2 \right)^{\frac{1}{2}} \leq \frac{1}{\sigma_{\min}} e_k \leq \frac{1}{\sigma_{\min}} \sqrt{\frac{2K}{\lambda'}} h$$

Collecting all the constants and we have

$$\begin{aligned}
\frac{1}{\sigma_{\min}} \sqrt{\frac{2K}{\lambda'}} &\leq \frac{8\kappa'}{\lambda'} (L + G) \max\{\alpha + 1.25, \gamma + 1\} (1.74 + 0.71\alpha) \left( \sqrt{\int_{\mathbb{R}^d} \|\mathbf{q}\|^2 d\mu} + d + \kappa' W_2(\pi_0, \pi) \right) \\
&\quad + \frac{4\kappa'}{\lambda'} (L + G) \max\{\alpha + 1.25, \gamma + 1\} \left( 0.5\alpha + (1.26\sqrt{\alpha} + 1.14\alpha\sqrt{\alpha} + 2.32\sqrt{\gamma})\sqrt{d} \right) \\
&\quad + \frac{8\kappa'}{\sqrt{\lambda'}} \left( \frac{\sqrt{\kappa' L'}}{\sqrt{\lambda'}} + 1 \right) L \max\{\alpha + 1.25, \gamma + 1\} (1.92 + 2.30\alpha L) \left( \sqrt{\int_{\mathbb{R}^d} \|\mathbf{q}\|^2 d\mu} + d + \kappa' W_2(\pi_0, \pi) \right) \\
&\quad + \frac{4\kappa'}{\sqrt{\lambda'}} \left( \frac{\sqrt{\kappa' L'}}{\sqrt{\lambda'}} + 1 \right) L \max\{\alpha + 1.25, \gamma + 1\} (2.60\sqrt{\alpha} + 3.34\sqrt{\gamma})\sqrt{d} \\
&\triangleq C
\end{aligned}$$

It is clear that in terms of the dependence on dimension  $d$ , we have  $C = \mathcal{O}(\sqrt{d})$ . In the regime where  $\frac{\gamma^2 - L}{\gamma} \geq \frac{m}{\gamma} + m\alpha$ , then  $\lambda' = \frac{m}{\gamma} + m\alpha$ . Recall the definition of  $\kappa'$  and there exist  $A', B' > 0$  such that  $\kappa' \leq A'\sqrt{\alpha} + B'$ . It follows that

$$C \leq \frac{a_1\alpha^3 + a_2\alpha^{\frac{5}{2}} + a_3\alpha^2 + a_4\alpha^{\frac{3}{2}} + a_5\alpha + a_6\alpha^{\frac{1}{2}} + a_7}{\lambda'} \leq b \frac{\alpha^3 + \frac{1}{\gamma^3}}{\lambda'} = b \frac{\alpha^3 + \frac{1}{\gamma^3}}{\frac{m}{\gamma} + m\alpha} = \frac{b}{m} \left( \alpha^2 - \frac{\alpha}{\gamma} + \frac{1}{\gamma^2} \right)$$

for some positive constants  $a_1, a_2, a_3, a_4, a_5, a_6, a_7, b > 0$  and independent of  $\alpha$ , in particular, we have  $b = \mathcal{O}(\sqrt{d})$ .  $\square$

### C.1 PROOF OF THEOREM 5.2

*Proof.* Denote the  $k$ -th iterate of the Strang's splitting method of HFHR by  $\bar{\mathbf{x}}_k$  with time step  $h$ , the solution of HFHR dynamics at time  $kh$  by  $\mathbf{x}_k$ . Both  $\bar{\mathbf{x}}_k$  and  $\mathbf{x}_k$  start from  $\mathbf{x}_0 = \begin{bmatrix} \mathbf{q}_0 \\ \mathbf{p}_0 \end{bmatrix}$ . Also denote the solution of HFHR dynamics starting from  $\tilde{\mathbf{x}}_0$  at time  $kh$  by  $\tilde{\mathbf{x}}_k$  where  $\tilde{\mathbf{x}}_0 = \begin{bmatrix} \tilde{\mathbf{q}}_0 \\ \tilde{\mathbf{p}}_0 \end{bmatrix}$ ,  $(\tilde{\mathbf{q}}_0, \tilde{\mathbf{p}}_0) \sim \pi$  and  $\mathbb{E} \left\| \begin{bmatrix} \mathbf{q}_0 - \tilde{\mathbf{q}}_0 \\ \mathbf{p}_0 - \tilde{\mathbf{p}}_0 \end{bmatrix} \right\|^2 = W_2^2(\pi_0, \pi)$ . Since  $\pi$  is the invariant distribution of HFHR dynamics, it follows that  $\tilde{\mathbf{x}}_k \sim \pi$ .

By Lemma D.5 and Theorem C.1, we have

$$\begin{aligned}
W_2^2(\mu_k, \mu) &= \inf_{\xi \in \Pi(\mu_k, \mu)} \mathbb{E}_{(\mathbf{q}_1, \mathbf{q}_2) \sim \xi} \|\mathbf{q}_1 - \mathbf{q}_2\|^2 \\
&\leq \inf_{\xi \in \Pi(\pi_k, \pi)} \mathbb{E}_{(\mathbf{x}_1, \mathbf{x}_2) \sim \xi} \|\mathbf{x}_1 - \mathbf{x}_2\|^2 \\
&\leq \mathbb{E} \|\bar{\mathbf{x}}_k - \tilde{\mathbf{x}}_k\|^2 \\
&\leq 2C^2 h^2 + 2\mathbb{E} \left\| P^{-1} P(\mathbf{x}_k - \tilde{\mathbf{x}}_k) \right\|^2 \\
&\leq 2C^2 h^2 + 2\|P^{-1}\|_2^2 \mathbb{E} \|\mathbf{x}_k - \tilde{\mathbf{x}}_k\|^2 \\
&\leq 2C^2 h^2 + 2\|P^{-1}\|_2^2 e^{-2\lambda' kh} \mathbb{E} \|P(\mathbf{x}_0 - \tilde{\mathbf{x}}_0)\|^2 \\
&\leq 2C^2 h^2 + 2(\kappa')^2 e^{-2\lambda' kh} W_2^2(\pi_0, \pi)
\end{aligned}$$

Take square root on both sides and apply  $\sqrt{a^2 + b^2} \leq a + b$ , we obtain

$$W_2(\mu_k, \mu) \leq \sqrt{2}Ch + \sqrt{2}\kappa' e^{-\lambda' kh} W_2(\pi_0, \pi).$$

$\square$

## C.2 PROOF OF COROLLARY 5.4

*Proof.* By Theorem 5.2, we have

$$W_2(\mu_k, \mu) \leq \sqrt{2}Ch + \sqrt{2}\kappa' e^{-\lambda' kh} W_2(\pi_0, \pi).$$

Given any target accuracy  $\epsilon > 0$ , if we run the Strang's splitting method of HFHR with  $h^* = \min\{h_0, \frac{\epsilon}{2\sqrt{2}C}\}$ , then after  $k^* = \frac{1}{\lambda'} \max\{\frac{1}{h_0}, \frac{2\sqrt{2}C}{\epsilon}\} \log \frac{2\sqrt{2}\kappa' W_2(\pi_0, \pi)}{\epsilon}$ , we have

$$W_2(\mu_{k^*}, \mu) \leq \sqrt{2}Ch + \sqrt{2}\kappa' e^{-\lambda' kh} W_2(\mu_0, \mu) \leq \frac{\epsilon}{2} + \frac{\epsilon}{2} = \epsilon.$$

Recall  $C = \mathcal{O}(\sqrt{d})$ , when high accuracy is needed, e.g.  $\epsilon < 2\sqrt{2}Ch_0$ , the iteration complexity to reach  $\epsilon$ -accuracy under 2-Wasserstein distance is  $k^* = \mathcal{O}(\frac{\sqrt{d}}{\epsilon} \log \frac{1}{\epsilon}) = 2\sqrt{2} \frac{C}{\lambda'} \frac{1}{\epsilon} \log \frac{2\sqrt{2}\kappa' W_2(\pi_0, \pi)}{\epsilon} = \tilde{\mathcal{O}}(\frac{\sqrt{d}}{\epsilon})$ . Recall from Theorem C.1,  $C \leq \frac{b}{m}(\alpha^2 - \frac{\alpha}{\gamma} + \frac{1}{\gamma^2})$ , we have

$$\frac{C}{\lambda'} \leq \frac{b}{m^2} \frac{\alpha^2 - \frac{\alpha}{\gamma} + \frac{1}{\gamma^2}}{\frac{1}{\gamma} + \alpha}$$

Denote  $g(\alpha) = \frac{b}{m^2} \frac{\alpha^2 - \frac{\alpha}{\gamma} + \frac{1}{\gamma^2}}{\frac{1}{\gamma} + \alpha}$ , simple calculation shows that  $\alpha^* = \arg\min_{\alpha \geq 0} g(\alpha) = \frac{\sqrt{3}-1}{\gamma} = \mathcal{O}(\frac{1}{\gamma})$ .  $\square$

## D TECHNICAL/AUXILIARY LEMMAS AND THEIR PROOFS

### D.1 DEPENDENCE OF ERROR OF SDE ON INITIAL VALUES

**Lemma D.1.** *Consider the following two SDE with different initial condition*

$$\begin{cases} dx_t = \mathbf{a}(x_t)dt + \sigma d\mathbf{W}_t, \\ \mathbf{x}(0) = \mathbf{x}_0 \end{cases} \quad \begin{cases} dy_t = \mathbf{a}(y_t)dt + \sigma d\mathbf{W}_t, \\ \mathbf{y}(0) = \mathbf{y}_0 \end{cases}$$

where  $\mathbf{a}(\mathbf{u}) \in \mathbb{R}^d$  is  $L$ -Lipschitz, and  $\sigma \in \mathbb{R}^{n \times n}$  is a constant matrix. For  $0 < h < \frac{1}{4L}$ , we have the following representation

$$\mathbf{x}_h - \mathbf{y}_h = \mathbf{x}_0 - \mathbf{y}_0 + \mathbf{z}$$

with

$$\mathbb{E}\|\mathbf{z}\|^2 \leq 2L^2 \|\mathbf{x}_0 - \mathbf{y}_0\|^2 h^2$$

*Proof.* Let  $\mathbf{z} = (\mathbf{x}_h - \mathbf{y}_h) - (\mathbf{x}_0 - \mathbf{y}_0) = \int_0^h \mathbf{a}(\mathbf{x}_s) - \mathbf{a}(\mathbf{y}_s) ds$ . Ito's lemma readily implies that

$$\begin{aligned} \mathbb{E}\|\mathbf{x}_h - \mathbf{y}_h\|^2 &= \|\mathbf{x}_0 - \mathbf{y}_0\|^2 + 2\mathbb{E} \int_0^h \langle \mathbf{x}_s - \mathbf{y}_s, \mathbf{a}(\mathbf{x}_s) - \mathbf{a}(\mathbf{y}_s) \rangle ds \\ &\leq \|\mathbf{x}_0 - \mathbf{y}_0\|^2 + 2L \int_0^h \mathbb{E}\|\mathbf{x}_s - \mathbf{y}_s\|^2 ds \end{aligned}$$

By Gronwall's inequality, it follows that

$$\mathbb{E}\|\mathbf{x}_h - \mathbf{y}_h\|^2 \leq \|\mathbf{x}_0 - \mathbf{y}_0\|^2 e^{2Lh} \leq 2\|\mathbf{x}_0 - \mathbf{y}_0\|^2, \text{ for } 0 < h < \frac{1}{4L}$$



and

$$\begin{aligned}
\mathbb{E}\|\mathbf{z}\|^2 &= \left\| \mathbb{E} \left[ \int_0^h \mathbf{a}(\mathbf{x}_s) - \mathbf{a}(\mathbf{y}_s) ds \right] \right\|^2 \leq \left( \int_0^h \left\| \mathbb{E} [\mathbf{a}(\mathbf{x}_s) - \mathbf{a}(\mathbf{y}_s)] \right\| ds \right)^2 \\
&\leq \int_0^h 1^2 ds \int_0^h \left\| \mathbb{E} [\mathbf{a}(\mathbf{x}_s) - \mathbf{a}(\mathbf{y}_s)] \right\|^2 ds \\
&\leq h \int_0^h \mathbb{E} \|\mathbf{a}(\mathbf{x}_s) - \mathbf{a}(\mathbf{y}_s)\|^2 ds \\
&\leq L^2 h \int_0^h \mathbb{E} \|\mathbf{x}_s - \mathbf{y}_s\|^2 ds \\
&\leq 2L^2 \|\mathbf{x}_0 - \mathbf{y}_0\|^2 h^2
\end{aligned}$$

□

## D.2 GROWTH BOUND OF SDE WITH ADDITIVE NOISE

**Lemma D.2.** Consider the following SDE with constant diffusion

$$\begin{cases} d\mathbf{x}_t = \mathbf{a}(\mathbf{x}_t)dt + \boldsymbol{\sigma}d\mathbf{W}_t, \\ \mathbf{x}(0) = \mathbf{x}_0 \end{cases}$$

where  $\mathbf{a}(\mathbf{x}) \in \mathbb{R}^d$  is  $L$ -smooth, i.e.,  $|\mathbf{a}(\mathbf{y}) - \mathbf{a}(\mathbf{x})| \leq L|\mathbf{y} - \mathbf{x}|$ ,  $\mathbf{a}(\mathbf{0}) = \mathbf{0}$  and  $\boldsymbol{\sigma} \in \mathbb{R}^{d \times d}$  is a constant matrix independent of time  $t$  and  $\mathbf{x}_t$ . Then for  $0 < h < \frac{1}{4L}$ , we have

$$\mathbb{E}\|\mathbf{x}_h - \mathbf{x}_0\|^2 \leq 2.57 \left( \|\boldsymbol{\sigma}\|_F^2 + 2hL^2\|\mathbf{x}_0\|^2 \right) h.$$

*Proof.* We have

$$\begin{aligned}
\mathbb{E}\|\mathbf{x}_h - \mathbf{x}_0\|^2 &= \mathbb{E} \left\| \int_0^h \mathbf{a}(\mathbf{x}_t) dt + \int_0^h \boldsymbol{\sigma} d\mathbf{W}_t \right\|^2 \\
&\leq 2\mathbb{E} \left\| \int_0^h \mathbf{a}(\mathbf{x}_t) dt \right\|^2 + 2\mathbb{E} \left\| \int_0^h \boldsymbol{\sigma} d\mathbf{W}_t \right\|^2 \\
&\stackrel{(i)}{=} 2\mathbb{E} \left\| \int_0^h \mathbf{a}(\mathbf{x}_t) dt \right\|^2 + 2 \int_0^h \|\boldsymbol{\sigma}\|_F^2 dt \\
&\leq 2\mathbb{E} \left[ \left( \int_0^h \|\mathbf{a}(\mathbf{x}_t)\| dt \right)^2 \right] + 2h\|\boldsymbol{\sigma}\|_F^2 \\
&\leq 2\mathbb{E} \left[ \left( \int_0^h \|\mathbf{a}(\mathbf{x}_t) - \mathbf{a}(\mathbf{x}_0)\| dt + \int_0^h \|\mathbf{a}(\mathbf{x}_0)\| dt \right)^2 \right] + 2h\|\boldsymbol{\sigma}\|_F^2 \\
&\leq 2\mathbb{E} \left[ \left( L \int_0^h \|\mathbf{x}_t - \mathbf{x}_0\| dt + h\|\mathbf{a}(\mathbf{x}_0)\| \right)^2 \right] + 2h\|\boldsymbol{\sigma}\|_F^2 \\
&\leq 4\mathbb{E} \left[ L^2 \left( \int_0^h \|\mathbf{x}_t - \mathbf{x}_0\| dt \right)^2 + h^2 \|\mathbf{a}(\mathbf{x}_0)\|^2 \right] + 2h\|\boldsymbol{\sigma}\|_F^2 \\
&\stackrel{(ii)}{\leq} 2h\|\boldsymbol{\sigma}\|_F^2 + 4h^2 \|\mathbf{a}(\mathbf{x}_0)\|^2 + 4L^2 h \int_0^h \mathbb{E} \|\mathbf{x}_t - \mathbf{x}_0\|^2 dt
\end{aligned}$$

where (i) is due to Ito's isometry, (ii) is due to Cauchy-Schwarz inequality and  $\|\sigma\|_F$  is the Frobenius norm of  $\sigma$ . By Gronwall's inequality, we obtain

$$\mathbb{E}\|\mathbf{x}_h - \mathbf{x}_0\|^2 \leq \left(2h\|\sigma\|_F^2 + 4h^2\|\mathbf{a}(\mathbf{x}_0)\|^2\right) \exp\left\{4L^2h^2\right\}.$$

Since  $\|\mathbf{a}(\mathbf{x}_0)\| = \|\mathbf{a}(\mathbf{x}_0) - \mathbf{a}(\mathbf{0})\| \leq L\|\mathbf{x}_0\|$ , when  $0 < h < \frac{1}{4L}$ , we finally reach at

$$\mathbb{E}\|\mathbf{x}_h - \mathbf{x}_0\|^2 \leq 2\left(\|\sigma\|_F^2 + 2hL^2\|\mathbf{x}_0\|^2\right) e^{\frac{1}{4}}h \leq 2.57\left(\|\sigma\|_F^2 + 2hL^2\|\mathbf{x}_0\|^2\right)h.$$

□

### D.3 LIPSCHITZ CONTINUITY OF THE DRIFT OF HFHR DYNAMICS

**Lemma D.3.** Assume  $\nabla f$  is  $L$ -Lipschitz, i.e.  $\|\nabla f(\mathbf{x}) - \nabla f(\mathbf{y})\| \leq L\|\mathbf{x} - \mathbf{y}\|$ , then the drift term of HFHR dynamics

$$\begin{bmatrix} \mathbf{p} - \alpha \nabla f(\mathbf{q}) \\ -\gamma \mathbf{p} - \nabla f(\mathbf{q}) \end{bmatrix}$$

is  $L'$ -Lipschitz, where  $L' \triangleq \sqrt{2} \max\{\sqrt{1 + \alpha^2} \max\{\frac{1}{\sqrt{2}}, L\}, \sqrt{1 + \gamma^2}\}$ . Let  $P$  be defined in Appendix A and  $\begin{bmatrix} \phi \\ \psi \end{bmatrix} = P \begin{bmatrix} \mathbf{q} \\ \mathbf{p} \end{bmatrix}$ , then  $\begin{bmatrix} \phi \\ \psi \end{bmatrix}$  satisfies the following SDE

$$\begin{bmatrix} d\phi \\ d\psi \end{bmatrix} = P \begin{bmatrix} \mathbf{p}(\phi, \psi) - \alpha \nabla f(\mathbf{q}(\phi, \psi)) \\ -\gamma \mathbf{p}(\phi, \psi) - \nabla f(\mathbf{q}(\phi, \psi)) \end{bmatrix} dt + P \begin{bmatrix} \sqrt{2\alpha}I & 0 \\ 0 & \sqrt{2\gamma}I \end{bmatrix} \begin{bmatrix} d\mathbf{W} \\ d\mathbf{B} \end{bmatrix}$$

and the drift term

$$P \begin{bmatrix} \mathbf{p}(\phi, \psi) - \alpha \nabla f(\mathbf{q}(\phi, \psi)) \\ -\gamma \mathbf{p}(\phi, \psi) - \nabla f(\mathbf{q}(\phi, \psi)) \end{bmatrix}$$

is  $L''$ -Lipschitz, where  $L'' = \kappa' L'$  and  $\kappa'$  is the condition number of  $P$ .

*Proof.* By direct computation and Cauchy-Schwarz inequality, we have

$$\begin{aligned} & \left\| \begin{bmatrix} \mathbf{p}_1 - \alpha \nabla f(\mathbf{q}_1) \\ -\gamma \mathbf{p}_1 - \nabla f(\mathbf{q}_1) \end{bmatrix} - \begin{bmatrix} \mathbf{p}_2 - \alpha \nabla f(\mathbf{q}_2) \\ -\gamma \mathbf{p}_2 - \nabla f(\mathbf{q}_2) \end{bmatrix} \right\| \\ &= \sqrt{\left\| -\alpha (\nabla f(\mathbf{q}_1) - \nabla f(\mathbf{q}_2)) + (\mathbf{p}_1 - \mathbf{p}_2) \right\|^2 + \left\| -(\nabla f(\mathbf{q}_1) - \nabla f(\mathbf{q}_2)) - \gamma (\mathbf{p}_1 - \mathbf{p}_2) \right\|^2} \\ &\leq \sqrt{2\alpha^2 \|\nabla f(\mathbf{q}_1) - \nabla f(\mathbf{q}_2)\|^2 + 2\|\mathbf{p}_1 - \mathbf{p}_2\|^2 + 2\|\nabla f(\mathbf{q}_1) - \nabla f(\mathbf{q}_2)\|^2 + 2\gamma^2 \|\mathbf{p}_1 - \mathbf{p}_2\|^2} \\ &\leq \sqrt{(2\alpha^2 L^2 + 2L^2)\|\mathbf{q}_1 - \mathbf{q}_2\| + (2 + 2\gamma^2)\|\mathbf{p}_1 - \mathbf{p}_2\|^2} \\ &\leq \sqrt{2} \max\{L\sqrt{1 + \alpha^2}, \sqrt{1 + \gamma^2}\} \left\| \begin{bmatrix} \mathbf{q}_1 - \mathbf{q}_2 \\ \mathbf{p}_1 - \mathbf{p}_2 \end{bmatrix} \right\| \\ &\leq \sqrt{2} \max\{\sqrt{1 + \alpha^2} \max\{\frac{1}{\sqrt{2}}, L\}, \sqrt{1 + \gamma^2}\} \left\| \begin{bmatrix} \mathbf{q}_1 - \mathbf{q}_2 \\ \mathbf{p}_1 - \mathbf{p}_2 \end{bmatrix} \right\| \\ &\triangleq L' \left\| \begin{bmatrix} \mathbf{q}_1 - \mathbf{q}_2 \\ \mathbf{p}_1 - \mathbf{p}_2 \end{bmatrix} \right\| \end{aligned}$$

By Ito's lemma, we have

$$\begin{bmatrix} d\phi \\ d\psi \end{bmatrix} = P \begin{bmatrix} \mathbf{p}(\phi, \psi) - \alpha \nabla f(\mathbf{q}(\phi, \psi)) \\ -\gamma \mathbf{p}(\phi, \psi) - \nabla f(\mathbf{q}(\phi, \psi)) \end{bmatrix} dt + P \begin{bmatrix} \sqrt{2\alpha}I & 0 \\ 0 & \sqrt{2\gamma}I \end{bmatrix} \begin{bmatrix} d\mathbf{W} \\ d\mathbf{B} \end{bmatrix}$$

Using the Lipschitz constant obtained for the drift of HFHR, we further have

$$\begin{aligned}
& \left\| P \begin{bmatrix} \mathbf{p}(\phi_1, \psi_1) - \alpha \nabla f(\mathbf{q}(\phi_1, \psi_1)) \\ -\gamma \mathbf{p}(\phi_1, \psi_1) - \nabla f(\mathbf{q}(\phi_1, \psi_1)) \end{bmatrix} - P \begin{bmatrix} \mathbf{p}(\phi_2, \psi_2) - \alpha \nabla f(\mathbf{q}(\phi_2, \psi_2)) \\ -\gamma \mathbf{p}(\phi_2, \psi_2) - \nabla f(\mathbf{q}(\phi_2, \psi_2)) \end{bmatrix} \right\| \\
& \leq \sigma_{\max} \left\| \begin{bmatrix} \mathbf{p}_1 - \alpha \nabla f(\mathbf{q}_1) \\ -\gamma \mathbf{p}_1 - \nabla f(\mathbf{q}_1) \end{bmatrix} - \begin{bmatrix} \mathbf{p}_2 - \alpha \nabla f(\mathbf{q}_2) \\ -\gamma \mathbf{p}_2 - \nabla f(\mathbf{q}_2) \end{bmatrix} \right\| \\
& \leq \sigma_{\max} L' \left\| \begin{bmatrix} \mathbf{q}_1 - \mathbf{q}_2 \\ \mathbf{p}_1 - \mathbf{p}_2 \end{bmatrix} \right\| \\
& \leq \sigma_{\max} L' \left\| P^{-1} \begin{bmatrix} \phi_1 - \phi_2 \\ \psi_1 - \psi_2 \end{bmatrix} \right\| \\
& \leq \sigma_{\max} L' \frac{1}{\sigma_{\min}} \left\| \begin{bmatrix} \phi_1 - \phi_2 \\ \psi_1 - \psi_2 \end{bmatrix} \right\| \\
& = \kappa' L' \left\| \begin{bmatrix} \phi_1 - \phi_2 \\ \psi_1 - \psi_2 \end{bmatrix} \right\|
\end{aligned}$$

where  $\sigma_{\max}$ ,  $\sigma_{\min}$  and  $\kappa'$  are the largest, smallest singular values and the condition number (w.r.t. 2-norm) of matrix  $P$ .  $\square$

**Remark D.4.** The following inequalities associated with  $L'$  will turn out to be useful in many proofs

$$L' \geq 1, L' \geq \sqrt{2}\gamma, L' \geq \sqrt{2}\alpha, L \geq \sqrt{2}L \text{ and } L' \geq \sqrt{2}\alpha L.$$

#### D.4 CONTRACTION OF (TRANSFORMED) HFHR DYNAMICS

**Lemma D.5.** Suppose  $f$  is  $L$ -smooth,  $m$ -strongly convex and  $\gamma^2 > L$ . Consider two copies of HFHR dynamics  $\begin{bmatrix} \mathbf{q}_t \\ \mathbf{p}_t \end{bmatrix}, \begin{bmatrix} \tilde{\mathbf{q}}_t \\ \tilde{\mathbf{p}}_t \end{bmatrix}$  (driven by the same Brownian motion) with initialization  $\begin{bmatrix} \mathbf{q}_0 \\ \mathbf{p}_0 \end{bmatrix}, \begin{bmatrix} \tilde{\mathbf{q}}_0 \\ \tilde{\mathbf{p}}_0 \end{bmatrix}$  respectively, then we have

$$\left\| P \begin{bmatrix} \mathbf{q}_t - \tilde{\mathbf{q}}_t \\ \mathbf{p}_t - \tilde{\mathbf{p}}_t \end{bmatrix} \right\| \leq e^{-\lambda' t} \left\| P \begin{bmatrix} \mathbf{q}_0 - \tilde{\mathbf{q}}_0 \\ \mathbf{p}_0 - \tilde{\mathbf{p}}_0 \end{bmatrix} \right\|$$

where  $P = \begin{bmatrix} \gamma I & I \\ 0 & \sqrt{1 + \alpha\gamma} I \end{bmatrix}$  and  $\lambda' = \min\{\frac{m}{\gamma} + \alpha m, \frac{\gamma^2 - L}{\gamma}\}$ .

*Proof.* Consider two copies of HFHR that are driven by the same Brownian motion

$$\begin{cases} d\mathbf{q}_t = (\mathbf{p}_t - \alpha \nabla f(\mathbf{q}_t))dt + \sqrt{2\alpha}d\mathbf{B}_t^1 \\ d\mathbf{p}_t = (-\gamma \mathbf{p}_t - \nabla f(\mathbf{q}_t))dt + \sqrt{2\gamma}d\mathbf{B}_t^2 \end{cases}, \quad \begin{cases} d\tilde{\mathbf{q}}_t = (\tilde{\mathbf{p}}_t - \alpha \nabla f(\tilde{\mathbf{q}}_t))dt + \sqrt{2\alpha}d\mathbf{B}_t^1 \\ d\tilde{\mathbf{p}}_t = (-\gamma \tilde{\mathbf{p}}_t - \nabla f(\tilde{\mathbf{q}}_t))dt + \sqrt{2\gamma}d\mathbf{B}_t^2 \end{cases}.$$

Based on Taylor's expansion, the difference of the two copies is expressed as

$$\frac{d}{dt} \begin{bmatrix} \mathbf{q}_t - \tilde{\mathbf{q}}_t \\ \mathbf{p}_t - \tilde{\mathbf{p}}_t \end{bmatrix} = - \begin{bmatrix} \alpha H_t & -I \\ H_t & \gamma I \end{bmatrix} \begin{bmatrix} \mathbf{q}_t - \tilde{\mathbf{q}}_t \\ \mathbf{p}_t - \tilde{\mathbf{p}}_t \end{bmatrix} \triangleq -A \begin{bmatrix} \mathbf{q}_t - \tilde{\mathbf{q}}_t \\ \mathbf{p}_t - \tilde{\mathbf{p}}_t \end{bmatrix}$$

where  $H_t = \int_0^1 \nabla^2 f(\tilde{\mathbf{q}}_t + s(\mathbf{q} - \tilde{\mathbf{q}}_t))ds$ . Denote the eigenvalues of  $H_t$  by  $\eta_i, 1 \leq i \leq d$ , by strong convexity and smoothness assumption on  $f$ , we have  $m \leq \eta_i \leq L, 1 \leq i \leq d$ .

Denote  $\begin{bmatrix} \phi_t \\ \psi_t \end{bmatrix} = P \begin{bmatrix} \mathbf{q}_t - \tilde{\mathbf{q}}_t \\ \mathbf{p}_t - \tilde{\mathbf{p}}_t \end{bmatrix}$  and consider  $\mathcal{L}_t = \frac{1}{2} \left\| \begin{bmatrix} \phi_t \\ \psi_t \end{bmatrix} \right\|^2$ , we have

$$\begin{aligned} \frac{d}{dt} \mathcal{L}_t &= - \begin{bmatrix} \phi_t \\ \psi_t \end{bmatrix}^T P A P^{-1} \begin{bmatrix} \phi_t \\ \psi_t \end{bmatrix} \\ &= - \begin{bmatrix} \phi_t \\ \psi_t \end{bmatrix}^T \frac{1}{2} (P A P^{-1} + (P^{-1})^T A^T P^T) \begin{bmatrix} \phi_t \\ \psi_t \end{bmatrix} \\ &= - \begin{bmatrix} \phi_t \\ \psi_t \end{bmatrix}^T \frac{1}{\gamma} \begin{bmatrix} (1 + \alpha\gamma)H_t & 0_{d \times d} \\ 0_{d \times d} & \gamma^2 I - H_t \end{bmatrix} \begin{bmatrix} \phi_t \\ \psi_t \end{bmatrix} \\ &\triangleq - \begin{bmatrix} \phi_t \\ \psi_t \end{bmatrix}^T B(\alpha) \begin{bmatrix} \phi_t \\ \psi_t \end{bmatrix} \end{aligned}$$

It is easy to see that

$$\lambda_{\min}(B(\alpha)) = \min_{i=1,2,\dots,d} \{ \min\{ \frac{\eta_i}{\gamma} + \alpha\eta_i, \gamma - \frac{\eta_i}{\gamma} \} \} \geq \min\{ \frac{m}{\gamma} + \alpha m, \frac{\gamma^2 - L}{\gamma} \} \triangleq \lambda'.$$

Therefore we have  $\frac{d}{dt} \mathcal{L}_t \leq -2\lambda_{\min} B(\alpha) \mathcal{L}_t \leq -2\lambda' \mathcal{L}_t$ . By Gronwall's inequality, we obtain

$$\left\| \begin{bmatrix} \phi_t \\ \psi_t \end{bmatrix} \right\|^2 \leq e^{-2\lambda' t} \left\| \begin{bmatrix} \phi_0 \\ \psi_0 \end{bmatrix} \right\|^2.$$

and the desired inequality follows by taking square root.  $\square$

#### D.5 LOCAL ERROR BETWEEN THE EXACT STRANG'S SPLITTING METHOD AND HFHR DYNAMICS

**Lemma D.6.** Assume  $f$  is  $L$ -smooth and  $\mathbf{0} \in \operatorname{argmin}_{\mathbf{x} \in \mathbb{R}^d} f(\mathbf{x})$ , i.e.  $\nabla f(\mathbf{0}) = \mathbf{0}$ . If  $0 < h \leq \frac{1}{4L'}$ , then compared with the HFHR dynamics, the exact Strang's splitting method has local mathematical expectation of deviation of order  $p_1 = 2$  and local mean-squared error of order  $p_2 = 2$ , i.e. there exist constants  $\hat{C}_1, \hat{C}_2 > 0$  such that

$$\begin{aligned} \|\mathbb{E} \mathbf{x}(h) - \mathbb{E} \hat{\mathbf{x}}(h)\| &\leq \hat{C}_1 h^{p_1} \\ \left( \mathbb{E} \left[ \|\mathbf{x}(h) - \hat{\mathbf{x}}(h)\|^2 \right] \right)^{\frac{1}{2}} &\leq \hat{C}_2 h^{p_2} \end{aligned}$$

where  $\mathbf{x}(h) = \begin{bmatrix} \mathbf{q}(h) \\ \mathbf{p}(h) \end{bmatrix}$  is the solution of the HFHR dynamics with initial value  $\mathbf{x}_0 = \begin{bmatrix} \mathbf{q}_0 \\ \mathbf{p}_0 \end{bmatrix}$  and  $\hat{\mathbf{x}}(h) = \begin{bmatrix} \hat{\mathbf{q}}(h) \\ \hat{\mathbf{p}}(h) \end{bmatrix}$  is the solution of the implementable Strang's splitting with initial value  $\mathbf{x}_0 = \begin{bmatrix} \mathbf{q}_0 \\ \mathbf{p}_0 \end{bmatrix}$ ,  $p_1 = 2$  and  $p_2 = 2$ . More concretely, we have

$$\begin{aligned} \hat{C}_1 &= L \max\{\alpha + 1.25, \gamma + 1\} \left( 1.74 \|\mathbf{x}_0\| + (1.26\sqrt{\alpha} + 2.84\sqrt{\gamma})\sqrt{hd} \right), \\ \hat{C}_2 &= L \max\{\alpha + 1.25, \gamma + 1\} \left( 1.92 \|\mathbf{x}_0\| + (1.30\sqrt{\alpha} + 3.22\sqrt{\gamma})\sqrt{hd} \right). \end{aligned}$$

*Proof.* The exact Strang's splitting integrator with step size  $h$  reads as  $\phi^{\frac{h}{2}} \circ \psi^h \circ \phi^{\frac{h}{2}}$  where

$$\phi : \begin{cases} d\mathbf{q} = \mathbf{p} dt \\ d\mathbf{p} = -\gamma \mathbf{p} dt + \sqrt{2\gamma} d\mathbf{B} \end{cases} \quad \psi : \begin{cases} d\mathbf{q} = -\alpha \nabla f(\mathbf{q}) dt + \sqrt{2\alpha d} \mathbf{W} \\ d\mathbf{p} = -\nabla f(\mathbf{q}) dt \end{cases}.$$

The  $\phi$  flow can be explicitly solved and the solution is

$$\begin{cases} \mathbf{q}(t) = \mathbf{q}_0 + \frac{1-e^{-\gamma t}}{\gamma} \mathbf{p}_0 + \sqrt{2\gamma} \int_0^t \frac{1-e^{-\gamma(t-s)}}{\gamma} d\mathbf{B}(s) \\ \mathbf{p}(t) = e^{-\gamma t} \mathbf{p}_0 + \sqrt{2\gamma} \int_0^t e^{-\gamma(t-s)} d\mathbf{B}(s) \end{cases}.$$

The  $\psi$  flow can be written as

$$\begin{cases} \mathbf{q}(t) = \mathbf{q}_0 - \int_0^t \alpha \nabla f(\mathbf{q}(s)) ds + \sqrt{2\alpha} \int_0^t d\mathbf{W}(s) \\ \mathbf{p}(t) = \mathbf{p}_0 - \int_0^t \nabla f(\mathbf{q}(s)) ds \end{cases}.$$

The solution of one-step exact Strang's splitting integrator with step size  $h$  can be written as

$$\begin{cases} \mathbf{q}_3 = \mathbf{q}_2(h) + \frac{1-e^{-\gamma\frac{h}{2}}}{\gamma} \mathbf{p}_2(h) + \sqrt{2\gamma} \int_{\frac{h}{2}}^h \frac{1-e^{-\gamma(h-s)}}{\gamma} d\mathbf{B}(s) \\ \mathbf{p}_3 = e^{-\gamma\frac{h}{2}} \mathbf{p}_2(h) + \sqrt{2\gamma} \int_{\frac{h}{2}}^h e^{-\gamma(h-s)} d\mathbf{B}(s) \\ \mathbf{q}_2(r) = \mathbf{q}_1 - \int_0^r \alpha \nabla f(\mathbf{q}_2(s)) ds + \sqrt{2\alpha} \int_0^r d\mathbf{W}(s) \quad (0 \leq r \leq h) \\ \mathbf{p}_2(r) = \mathbf{p}_1 - \int_0^r \nabla f(\mathbf{q}_2(s)) ds \\ \mathbf{q}_1 = \mathbf{q}_0 + \frac{1-e^{-\gamma\frac{h}{2}}}{\gamma} \mathbf{p}_0 + \sqrt{2\gamma} \int_0^{\frac{h}{2}} \frac{1-e^{-\gamma(\frac{h}{2}-s)}}{\gamma} d\mathbf{B}(s) \\ \mathbf{p}_1 = e^{-\gamma\frac{h}{2}} \mathbf{p}_0 + \sqrt{2\gamma} \int_0^{\frac{h}{2}} e^{-\gamma(\frac{h}{2}-s)} d\mathbf{B}(s) \end{cases}$$

Therefore, we have  $\hat{\mathbf{q}}(h) = \mathbf{q}_3, \hat{\mathbf{p}}(h) = \mathbf{p}_3$  and

$$\begin{aligned} \hat{\mathbf{q}}(h) &= \sqrt{2\gamma} \int_{\frac{h}{2}}^h \frac{1-e^{-\gamma(h-s)}}{\gamma} d\mathbf{B}(s) + \underbrace{\mathbf{q}_1 - \int_0^h \alpha \nabla f(\mathbf{q}_2(s)) ds + \sqrt{2\alpha} \int_0^h d\mathbf{W}(s)}_{\mathbf{q}_2(h)} \\ &\quad + \frac{1-e^{-\gamma\frac{h}{2}}}{\gamma} \left[ \underbrace{\mathbf{p}_1 - \int_0^h \nabla f(\mathbf{q}_2(s)) ds}_{\mathbf{p}_2(h)} \right] \\ &= \sqrt{2\gamma} \int_{\frac{h}{2}}^h \frac{1-e^{-\gamma(h-s)}}{\gamma} d\mathbf{B}(s) - \int_0^h \alpha \nabla f(\mathbf{q}_2(s)) ds + \sqrt{2\alpha} \int_0^h d\mathbf{W}(s) - \frac{1-e^{-\gamma\frac{h}{2}}}{\gamma} \int_0^h \nabla f(\mathbf{q}_2(s)) ds \\ &\quad + \underbrace{\mathbf{q}_0 + \frac{1-e^{-\gamma\frac{h}{2}}}{\gamma} \mathbf{p}_0 + \sqrt{2\gamma} \int_0^{\frac{h}{2}} \frac{1-e^{-\gamma(\frac{h}{2}-s)}}{\gamma} d\mathbf{B}(s)}_{\mathbf{q}_1} + \frac{1-e^{-\gamma\frac{h}{2}}}{\gamma} \left[ \underbrace{e^{-\gamma\frac{h}{2}} \mathbf{p}_0 + \sqrt{2\gamma} \int_0^{\frac{h}{2}} e^{-\gamma(\frac{h}{2}-s)} d\mathbf{B}(s)}_{\mathbf{p}_1} \right] \\ &= \mathbf{q}_0 + \frac{1-e^{-\gamma h}}{\gamma} \mathbf{p}_0 - \left( \alpha + \frac{1-e^{-\gamma\frac{h}{2}}}{\gamma} \right) \int_0^h \nabla f(\mathbf{q}_2(s)) ds \\ &\quad + \sqrt{2\alpha} \int_0^h d\mathbf{W}(s) + \sqrt{2\gamma} \int_{\frac{h}{2}}^h \frac{1-e^{-\gamma(h-s)}}{\gamma} d\mathbf{B}(s) + \sqrt{2\gamma} \int_0^{\frac{h}{2}} \frac{1-e^{-\gamma(\frac{h}{2}-s)}}{\gamma} d\mathbf{B}(s) \\ &\quad + \frac{1-e^{-\gamma\frac{h}{2}}}{\gamma} \sqrt{2\gamma} \int_0^{\frac{h}{2}} e^{-\gamma(\frac{h}{2}-s)} d\mathbf{B}(s) \\ \hat{\mathbf{p}}(h) &= e^{-\gamma\frac{h}{2}} \left[ \underbrace{\mathbf{p}_1 - \int_0^h \nabla f(\mathbf{q}_2(s)) ds}_{\mathbf{p}_2(h)} \right] + \sqrt{2\gamma} \int_{\frac{h}{2}}^h e^{-\gamma(h-s)} d\mathbf{B}(s) \\ &= e^{-\gamma\frac{h}{2}} \left[ \underbrace{e^{-\gamma\frac{h}{2}} \mathbf{p}_0 + \sqrt{2\gamma} \int_0^{\frac{h}{2}} e^{-\gamma(\frac{h}{2}-s)} d\mathbf{B}(s)}_{\mathbf{p}_1} \right] - e^{-\gamma\frac{h}{2}} \int_0^h \nabla f(\mathbf{q}_2(s)) ds + \sqrt{2\gamma} \int_{\frac{h}{2}}^h e^{-\gamma(h-s)} d\mathbf{B}(s) \\ &= e^{-\gamma h} \mathbf{p}_0 - e^{-\gamma\frac{h}{2}} \int_0^h \nabla f(\mathbf{q}_2(s)) ds + e^{-\gamma\frac{h}{2}} \sqrt{2\gamma} \int_0^{\frac{h}{2}} e^{-\gamma(\frac{h}{2}-s)} d\mathbf{B}(s) + \sqrt{2\gamma} \int_{\frac{h}{2}}^h e^{-\gamma(h-s)} d\mathbf{B}(s) \end{aligned}$$

It is clear that  $\hat{\mathbf{q}}(h), \hat{\mathbf{p}}(h)$  should be compared with the exact solution of HFHR at time  $h$ , which can be written as

$$\begin{aligned}\mathbf{q}(h) &= \mathbf{q}_0 + \frac{1 - e^{-\gamma h}}{\gamma} \mathbf{p}_0 - \int_0^h \left( \frac{1 - e^{-\gamma(h-s)}}{\gamma} + \alpha \right) \nabla f(\mathbf{q}(s)) ds + \sqrt{2\alpha} \int_0^h d\mathbf{W}_s + \sqrt{2\gamma} \int_0^h \frac{1 - e^{-\gamma(h-s)}}{\gamma} d\mathbf{B}_s \\ \mathbf{p}(h) &= e^{-\gamma h} \mathbf{p}_0 - \int_0^h e^{-\gamma(h-s)} \nabla f(\mathbf{q}(s)) ds + \sqrt{2\gamma} \int_0^h e^{-\gamma(h-s)} d\mathbf{B}(s)\end{aligned}$$

Subtracting  $\mathbf{q}(h), \mathbf{p}(h)$  from  $\hat{\mathbf{q}}(h), \hat{\mathbf{p}}(h)$  respectively, we obtain

$$\begin{aligned}\hat{\mathbf{q}}(h) - \mathbf{q}(h) &= - \left( \alpha + \frac{1 - e^{-\gamma \frac{h}{2}}}{\gamma} \right) \int_0^h \nabla f(\mathbf{q}_2(s)) - \nabla f(\mathbf{q}(s)) ds \\ &\quad + \int_0^h \left( \frac{1 - e^{-\gamma(h-s)}}{\gamma} - \frac{1 - e^{-\gamma \frac{h}{2}}}{\gamma} \right) \nabla f(\mathbf{q}(s)) ds \\ \hat{\mathbf{p}}(h) - \mathbf{p}(h) &= -e^{-\gamma \frac{h}{2}} \int_0^h \nabla f(\mathbf{q}_2(s)) - \nabla f(\mathbf{q}(s)) ds + \int_0^h \left( e^{-\gamma(h-s)} - e^{-\gamma \frac{h}{2}} \right) \nabla f(\mathbf{q}(s)) ds\end{aligned}$$

It should be clear now that we will need to bound the term  $\nabla f(\mathbf{q}_2) - \nabla f(\mathbf{q})$  and  $\nabla f(\mathbf{q})$ . Since

$$\begin{aligned}\mathbf{q}_2(r) &= \mathbf{q}_0 + \frac{1 - e^{-\gamma \frac{h}{2}}}{\gamma} \mathbf{p}_0 + \sqrt{2\gamma} \int_0^{\frac{h}{2}} \frac{1 - e^{-\gamma(\frac{h}{2}-s)}}{\gamma} d\mathbf{B}(s) - \alpha \int_0^r \nabla f(\mathbf{q}_2(s)) ds + \sqrt{2\alpha} \int_0^r d\mathbf{W}(s) \\ \mathbf{q}(r) &= \mathbf{q}_0 + \frac{1 - e^{-\gamma r}}{\gamma} \mathbf{p}_0 - \int_0^r \left( \frac{1 - e^{-\gamma(r-s)}}{\gamma} + \alpha \right) \nabla f(\mathbf{q}(s)) ds + \sqrt{2\alpha} \int_0^r d\mathbf{W}(s) \\ &\quad + \sqrt{2\gamma} \int_0^r \frac{1 - e^{-\gamma(r-s)}}{\gamma} d\mathbf{B}(s),\end{aligned}$$

we then have

$$\begin{aligned}\mathbf{q}_2(r) - \mathbf{q}(r) &= \frac{e^{-\gamma r} - e^{-\gamma \frac{h}{2}}}{\gamma} \mathbf{p}_0 - \alpha \int_0^r \nabla f(\mathbf{q}_2(s)) - \nabla f(\mathbf{q}(s)) ds + \int_0^r \frac{1 - e^{-\gamma(r-s)}}{\gamma} \nabla f(\mathbf{q}(s)) ds \\ &\quad + \sqrt{2\gamma} \int_0^{\frac{h}{2}} \frac{1 - e^{-\gamma(\frac{h}{2}-s)}}{\gamma} d\mathbf{B}(s) - \sqrt{2\gamma} \int_0^r \frac{1 - e^{-\gamma(r-s)}}{\gamma} d\mathbf{B}(s)\end{aligned}$$

By Lemma D.3 and D.2, when  $0 < h < \frac{1}{4L'}$ , we have the following for the solution of HFHR dynamics

$$\mathbb{E} \|\mathbf{x}_{0, \mathbf{x}_0}(h) - \mathbf{x}_0\|^2 \leq \hat{C}_0 h$$

where  $\hat{C}_0 = 5.14 \left\{ (\alpha + \gamma)d + h(L')^2 \|\mathbf{x}_0\|^2 \right\}$  and hence

$$\begin{aligned}\mathbb{E} \left[ \int_0^r \|\nabla f(\mathbf{q}(s))\|^2 ds \right] &\leq \mathbb{E} \left[ 2 \int_0^r \|\nabla f(\mathbf{q}(0))\|^2 ds + 2 \int_0^r \|\nabla f(\mathbf{q}(s)) - \nabla f(\mathbf{q}(0))\|^2 ds \right] \\ &\leq \mathbb{E} \left[ 2L^2 r \|\mathbf{q}(0)\|^2 + 2L^2 \int_0^r \|\mathbf{q}(s) - \mathbf{q}(0)\|^2 ds \right] \\ &\leq 2L^2 r \|\mathbf{x}_0\|^2 + 2L^2 \mathbb{E} \left[ \int_0^r \|\mathbf{q}(s) - \mathbf{q}(0)\|^2 ds \right] \\ &\leq 2L^2 r \|\mathbf{x}_0\|^2 + 2L^2 \hat{C}_0 \int_0^r s ds \\ &\leq L^2 r \left( 2\|\mathbf{x}_0\|^2 + h\hat{C}_0 \right) \\ &\leq L^2 r \left( 2.33\|\mathbf{x}_0\|^2 + 5.14(\alpha + \gamma)dh \right)\end{aligned}\tag{12}$$

Now  $\mathbb{E} [\|\mathbf{q}_2 - \mathbf{q}\|^2]$  can be bounded as follow

$$\begin{aligned}
& \mathbb{E} [\|\mathbf{q}_2(r) - \mathbf{q}(r)\|^2] \\
& \leq 5 \left\{ \left( \frac{e^{-\gamma r} - e^{-\gamma \frac{h}{2}}}{\gamma} \right)^2 \|\mathbf{p}_0\|^2 + \alpha^2 \mathbb{E} \left\| \int_0^r \nabla f(\mathbf{q}_2(s)) - \nabla f(\mathbf{q}(s)) ds \right\|^2 + \mathbb{E} \left\| \int_0^r \frac{1 - e^{-\gamma(r-s)}}{\gamma} \nabla f(\mathbf{q}(s)) ds \right\|^2 \right\} \\
& \quad + 5 \left\{ 2\gamma \mathbb{E} \left\| \int_0^{\frac{h}{2}} \frac{1 - e^{-\gamma(\frac{h}{2}-s)}}{\gamma} d\mathbf{B}(s) \right\|^2 + 2\gamma \mathbb{E} \left\| \int_0^r \frac{1 - e^{-\gamma(r-s)}}{\gamma} d\mathbf{B}(s) \right\|^2 \right\} \quad (\text{Cauchy-Schwartz Inequality}) \\
& \leq 5 \left\{ \frac{h^2}{4} \|\mathbf{x}_0\|^2 + \alpha^2 L^2 r \int_0^r \mathbb{E} \|\mathbf{q}_2(s) - \mathbf{q}(s)\|^2 ds + \int_0^r \left( \frac{1 - e^{-\gamma(r-s)}}{\gamma} \right)^2 ds \int_0^r \mathbb{E} \|\nabla f(\mathbf{q}(s))\|^2 ds \right\} \\
& \quad + 5 \left\{ \frac{\gamma d h^3}{12} + \frac{2\gamma d}{3} r^3 \right\} \\
& \leq 5 \left\{ \frac{h^2}{4} \|\mathbf{x}_0\|^2 + \alpha^2 L^2 r \int_0^r \mathbb{E} \|\mathbf{q}_2(s) - \mathbf{q}(s)\|^2 ds + \frac{h^3}{3} \mathbb{E} \left[ \int_0^r \|\nabla f(\mathbf{q}(s))\|^2 \right] + \frac{3\gamma d}{4} h^3 \right\} \\
& \leq 5 \left\{ \frac{h^2}{4} \|\mathbf{x}_0\|^2 + \frac{3\gamma d}{4} h^3 + \frac{h^3}{3} L^2 \left( 2.33 \|\mathbf{x}_0\|^2 + 5.14(\alpha + \gamma)dh \right) r + \alpha^2 L^2 r \int_0^r \mathbb{E} \|\mathbf{q}_2(s) - \mathbf{q}(s)\|^2 ds \right\} \\
& \leq 5h^2 \left\{ \frac{1}{4} \|\mathbf{x}_0\|^2 + \frac{3\gamma d}{4} h + \frac{h^2}{3} L^2 \left( 2.33 \|\mathbf{x}_0\|^2 + 5.14(\alpha + \gamma)dh \right) \right\} + 5\alpha^2 L^2 h \int_0^r \mathbb{E} \|\mathbf{q}_2(s) - \mathbf{q}(s)\|^2 ds
\end{aligned}$$

By Gronwall's inequality and  $0 < h \leq \frac{1}{4L^2}$ , we have

$$\begin{aligned}
\mathbb{E} [\|\mathbf{q}_2(r) - \mathbf{q}(r)\|^2] & \leq 5h^2 \left\{ \frac{1}{4} \|\mathbf{x}_0\|^2 + \frac{3\gamma d}{4} h + \frac{h^2}{3} L^2 \left( 2.33 \|\mathbf{x}_0\|^2 + 5.14(\alpha + \gamma)dh \right) \right\} \exp\{5\alpha^2 L^2 h^2\} \\
& \leq 5h^2 \left\{ \frac{1}{4} \|\mathbf{x}_0\|^2 + \frac{3\gamma d}{4} h + \frac{h^2}{3} L^2 \left( 2.33 \|\mathbf{x}_0\|^2 + 5.14(\alpha + \gamma)dh \right) \right\} e^{\frac{5}{32}} \\
& \leq 5.85h^2 \left\{ 0.28 \|\mathbf{x}_0\|^2 + (0.06\alpha + 0.81\gamma)hd \right\} \\
& \leq h^2 \left\{ 1.64 \|\mathbf{x}_0\|^2 + (0.36\alpha + 4.74\gamma)hd \right\}. \tag{13}
\end{aligned}$$

With bounds in Equation (12) and (13), we are now ready to show  $p_1$  and  $p_2$ . For  $p_1$ , i.e. the order of the mathematical expectation of deviation, we have

$$\begin{aligned}
& \left\| \mathbb{E} \begin{bmatrix} \hat{\mathbf{q}}(h) \\ \hat{\mathbf{p}}(h) \end{bmatrix} - \begin{bmatrix} \mathbf{q}(h) \\ \mathbf{p}(h) \end{bmatrix} \right\| \\
& \leq \left\| \mathbb{E} [\hat{\mathbf{q}}(h) - \mathbf{q}(h)] \right\| + \left\| \mathbb{E} [\hat{\mathbf{p}}(h) - \mathbf{p}(h)] \right\| \\
& \leq \left( \alpha + \frac{1 - e^{-\gamma \frac{h}{2}}}{\gamma} \right) \left\| \int_0^h \mathbb{E} [\nabla f(\mathbf{q}_2(s)) - \nabla f(\mathbf{q}(s))] ds \right\| + \left\| \int_0^h \left( \frac{1 - e^{-\gamma(h-s)}}{\gamma} - \frac{1 - e^{-\gamma \frac{h}{2}}}{\gamma} \right) \mathbb{E} [\nabla f(\mathbf{q}(s))] ds \right\| \\
& \quad + e^{-\gamma \frac{h}{2}} \left\| \int_0^{\frac{h}{2}} \mathbb{E} [\nabla f(\mathbf{q}_2(s)) - \nabla f(\mathbf{q}(s))] ds \right\| + \left\| \int_0^h (e^{-\gamma(h-s)} - e^{-\gamma \frac{h}{2}}) \mathbb{E} [\nabla f(\mathbf{q}(s))] ds \right\| \\
& \leq \left( \alpha + 1 + \frac{h}{2} \right) L \int_0^h \mathbb{E} \|\mathbf{q}_2(s) - \mathbf{q}(s)\| ds \\
& \quad + \int_0^h \left( \left| \frac{1 - e^{-\gamma(h-s)}}{\gamma} - \frac{1 - e^{-\gamma \frac{h}{2}}}{\gamma} \right| + |e^{-\gamma(h-s)} - e^{-\gamma \frac{h}{2}}| \right) \left\| \mathbb{E} [\nabla f(\mathbf{q}(s))] \right\| ds \\
& \leq L \left( \alpha + 1 + \frac{h}{2} \right) \int_0^h \mathbb{E} \|\mathbf{q}_2(s) - \mathbf{q}(s)\| ds \\
& \quad + \left\{ \left( \int_0^h \left| \frac{1 - e^{-\gamma(h-s)}}{\gamma} - \frac{1 - e^{-\gamma \frac{h}{2}}}{\gamma} \right|^2 ds \right)^{\frac{1}{2}} + \left( \int_0^h |e^{-\gamma(h-s)} - e^{-\gamma \frac{h}{2}}|^2 ds \right)^{\frac{1}{2}} \right\} \left( \int_0^h \left\| \mathbb{E} [\nabla f(\mathbf{q}(s))] \right\|^2 ds \right)^{\frac{1}{2}} \\
& \leq L \left( \alpha + 1 + \frac{h}{2} \right) \int_0^h \left( \mathbb{E} \|\mathbf{q}_2(s) - \mathbf{q}(s)\|^2 \right)^{\frac{1}{2}} ds + \frac{1 + \gamma}{2\sqrt{3}} h^{\frac{3}{2}} \left( \mathbb{E} \int_0^h \left\| \nabla f(\mathbf{q}(s)) \right\|^2 ds \right)^{\frac{1}{2}} \\
& \leq L \left( \alpha + 1 + \frac{h}{2} \right) h^2 \left\{ 1.64 \|\mathbf{x}_0\|^2 + (0.36\alpha + 4.74\gamma)hd \right\}^{\frac{1}{2}} + \frac{1 + \gamma}{2\sqrt{3}} h^2 L \left( 2.33 \|\mathbf{x}_0\|^2 + 5.14(\alpha + \gamma)dh \right)^{\frac{1}{2}} \\
& \leq L(\alpha + 1.25) h^2 \left( 1.29 \|\mathbf{x}_0\| + \sqrt{0.36\alpha + 4.74\gamma} \sqrt{hd} \right) + (1 + \gamma) h^2 L \left( 0.45 \|\mathbf{x}_0\| + \sqrt{0.43\alpha + 0.43\gamma} \sqrt{dh} \right) \\
& \leq L h^2 \max\{\alpha + 1.25, \gamma + 1\} \left( 1.74 \|\mathbf{x}_0\| + (1.26\sqrt{\alpha} + 2.84\sqrt{\gamma}) \sqrt{hd} \right)
\end{aligned}$$

The above derivation proves  $p_1 = 2$  with

$$\hat{C}_1 = L \max\{\alpha + 1.25, \gamma + 1\} \left( 1.74 \|\mathbf{x}_0\| + (1.26\sqrt{\alpha} + 2.84\sqrt{\gamma}) \sqrt{hd} \right).$$



We now proceed with  $p_2$ , i.e. mean-square error

$$\begin{aligned}
& \mathbb{E} \left\| \begin{bmatrix} \hat{\mathbf{q}}(h) \\ \hat{\mathbf{p}}(h) \end{bmatrix} - \begin{bmatrix} \mathbf{q}(h) \\ \mathbf{p}(h) \end{bmatrix} \right\|^2 \\
& \leq 2 \left( \alpha + \frac{h}{2} \right)^2 \mathbb{E} \left\| \int_0^h \nabla f(\mathbf{q}_2(s)) - \nabla f(\mathbf{q}(s)) ds \right\|^2 + 2 \mathbb{E} \left\| \int_0^h \left( \frac{1 - e^{-\gamma(h-s)}}{\gamma} - \frac{1 - e^{-\gamma \frac{h}{2}}}{\gamma} \right) \nabla f(\mathbf{q}(s)) ds \right\|^2 \\
& \quad + 2 \mathbb{E} \left\| \int_0^h \nabla f(\mathbf{q}_2(s)) - \nabla f(\mathbf{q}(s)) ds \right\|^2 + 2 \mathbb{E} \left\| \int_0^h \left( e^{-\gamma(h-s)} - e^{-\gamma \frac{h}{2}} \right) \nabla f(\mathbf{q}(s)) ds \right\|^2 \\
& \leq 2 \left( \left( \alpha + \frac{h}{2} \right)^2 + 1 \right) L^2 \mathbb{E} \left( \int_0^h |\mathbf{q}_2(s) - \mathbf{q}(s)| ds \right)^2 + 2 \int_0^h \left| \frac{1 - e^{-\gamma(h-s)}}{\gamma} - \frac{1 - e^{-\gamma \frac{h}{2}}}{\gamma} \right|^2 ds \int_0^h \mathbb{E} \|\nabla f(\mathbf{q}(s))\|^2 ds \\
& \quad + 2 \int_0^h \left| e^{-\gamma(h-s)} - e^{-\gamma \frac{h}{2}} \right|^2 ds \int_0^h \mathbb{E} \|\nabla f(\mathbf{q}(s))\|^2 ds \\
& \leq 2 \left( \left( \alpha + \frac{h}{2} \right)^2 + 1 \right) L^2 h \int_0^h \mathbb{E} |\mathbf{q}_2(s) - \mathbf{q}(s)|^2 ds + \frac{1 + \gamma^2}{6} h^3 \int_0^h \mathbb{E} \|\nabla f(\mathbf{q}(s))\|^2 ds \\
& \leq 2 \left( \left( \alpha + \frac{h}{2} \right)^2 + 1 \right) L^2 \left\{ 1.64 \|\mathbf{x}_0\|^2 + (0.36\alpha + 4.74\gamma)hd \right\} h^4 + \frac{1 + \gamma^2}{6} L^2 \left\{ 2.33 \|\mathbf{x}_0\|^2 + 5.14(\alpha + \gamma)hd \right\} h^4 \\
& \leq L^2 \max\{(\alpha + 1.25)^2, 1 + \gamma^2\} \left( 3.67 \|\mathbf{x}_0\|^2 + (1.68\alpha + 10.34\gamma)hd \right) h^4
\end{aligned}$$

The above derivation implies  $p_2 = 2$  with

$$\hat{C}_2 = L \max\{\alpha + 1.25, 1 + \gamma\} \left( 1.92 \|\mathbf{x}_0\| + (1.30\sqrt{\alpha} + 3.22\sqrt{\gamma})\sqrt{hd} \right).$$

□

#### D.6 LOCAL ERROR BETWEEN ALGORITHM 1 AND THE EXACT STRANG'S SPLITTING METHOD

**Lemma D.7.** Assume  $f$  is  $L$ -smooth,  $\mathbf{0} \in \operatorname{argmin}_{\mathbf{x} \in \mathbb{R}^d} f(\mathbf{x})$ , i.e.  $\nabla f(\mathbf{0}) = \mathbf{0}$  and the operator  $\nabla \Delta f$  grows at most linearly, i.e.  $\|\nabla \Delta f(\mathbf{q})\| \leq G\sqrt{1 + \|\mathbf{q}\|^2}$ . If  $0 < h \leq \frac{1}{4L}$ , then compared with the exact Strang's splitting method of HFHR dynamics, the implementable Strang's splitting method has local mathematical expectation of deviation of order  $p_1 = 2$  and local mean-squared error of order  $p_2 = 1.5$ , i.e. there exist constants  $\bar{C}_1, \bar{C}_2 > 0$  such that

$$\|\mathbb{E}\hat{\mathbf{x}}(h) - \mathbb{E}\bar{\mathbf{x}}(h)\| \leq \bar{C}_1 h^{p_1}$$

$$\left( \mathbb{E} \left[ \|\hat{\mathbf{x}}(h) - \bar{\mathbf{x}}(h)\|^2 \right] \right)^{\frac{1}{2}} \leq \bar{C}_2 h^{p_2}$$

where  $\hat{\mathbf{x}}(h) = \begin{bmatrix} \hat{\mathbf{q}}(h) \\ \hat{\mathbf{p}}(h) \end{bmatrix}$  is the solution of the exact Strang's splitting method for HFHR with initial value  $\mathbf{x}_0 = \begin{bmatrix} \mathbf{q}_0 \\ \mathbf{p}_0 \end{bmatrix}$  and  $\bar{\mathbf{x}}(h) = \begin{bmatrix} \bar{\mathbf{q}}(h) \\ \bar{\mathbf{p}}(h) \end{bmatrix}$  is the one-step result of Algorithm 1 with initial value  $\mathbf{x}_0 = \begin{bmatrix} \mathbf{q}_0 \\ \mathbf{p}_0 \end{bmatrix}$ ,  $p_1 = 2$  and  $p_2 = 1.5$ . More concretely, we have

$$\bar{C}_1 = \alpha(\alpha + 1.125)(L + G) \left[ 0.5 + 0.71 \|\mathbf{x}_0\| + (1.14\sqrt{\alpha} + 0.21\sqrt{\gamma}h)\sqrt{hd} \right]$$

and

$$\bar{C}_2 = L(\alpha + 0.73) \left( 2.30\sqrt{h}\alpha L \|\mathbf{x}_0\| + (2.27\sqrt{\alpha} + 0.12\sqrt{\gamma}h)\sqrt{d} \right).$$

*Proof.* The solution of one-step exact Strang's splitting integrator with step size  $h$  can be written as

$$\begin{cases} \mathbf{q}_3 = \mathbf{q}_2(h) + \frac{1-e^{-\gamma\frac{h}{2}}}{\gamma}\mathbf{p}_2(h) + \sqrt{2\gamma}\int_{\frac{h}{2}}^h \frac{1-e^{-\gamma(h-s)}}{\gamma}d\mathbf{B}(s) \\ \mathbf{p}_3 = e^{-\gamma\frac{h}{2}}\mathbf{p}_2(h) + \sqrt{2\gamma}\int_{\frac{h}{2}}^h e^{-\gamma(h-s)}d\mathbf{B}(s) \\ \mathbf{q}_2(r) = \mathbf{q}_1 - \int_0^r \alpha \nabla f(\mathbf{q}_2(s))ds + \sqrt{2\alpha}\int_0^r d\mathbf{W}(s) \quad (0 \leq r \leq h) \\ \mathbf{p}_2(r) = \mathbf{p}_1 - \int_0^r \nabla f(\mathbf{q}_2(s))ds \\ \mathbf{q}_1 = \mathbf{q}_0 + \frac{1-e^{-\gamma\frac{h}{2}}}{\gamma}\mathbf{p}_0 + \sqrt{2\gamma}\int_0^{\frac{h}{2}} \frac{1-e^{-\gamma(\frac{h}{2}-s)}}{\gamma}d\mathbf{B}(s) \\ \mathbf{p}_1 = e^{-\gamma\frac{h}{2}}\mathbf{p}_0 + \sqrt{2\gamma}\int_0^{\frac{h}{2}} e^{-\gamma(\frac{h}{2}-s)}d\mathbf{B}(s) \end{cases}$$

and the solution of one-step implementable Strang's splitting integrator with step size  $h$  can be written as

$$\begin{cases} \bar{\mathbf{q}}_3 = \bar{\mathbf{q}}_2(h) + \frac{1-e^{-\gamma\frac{h}{2}}}{\gamma}\bar{\mathbf{p}}_2(h) + \sqrt{2\gamma}\int_0^{\frac{h}{2}} \frac{1-e^{-\gamma(\frac{h}{2}-s)}}{\gamma}d\mathbf{B}(\frac{h}{2}+s) \\ \bar{\mathbf{p}}_3 = e^{-\gamma\frac{h}{2}}\bar{\mathbf{p}}_2(h) + \sqrt{2\gamma}\int_0^{\frac{h}{2}} e^{-\gamma(\frac{h}{2}-s)}d\mathbf{B}(\frac{h}{2}+s) \\ \bar{\mathbf{q}}_2(r) = \mathbf{q}_1 - \int_0^r \alpha \nabla f(\mathbf{q}_1)ds + \sqrt{2\alpha}\int_0^r d\mathbf{W}(s) \quad (0 \leq r \leq h) \\ \bar{\mathbf{p}}_2(r) = \mathbf{p}_1 - \int_0^r \nabla f(\mathbf{q}_1)ds \\ \mathbf{q}_1 = \mathbf{q}_0 + \frac{1-e^{-\gamma\frac{h}{2}}}{\gamma}\mathbf{p}_0 + \sqrt{2\gamma}\int_0^{\frac{h}{2}} \frac{1-e^{-\gamma(\frac{h}{2}-s)}}{\gamma}d\mathbf{B}(s) \\ \mathbf{p}_1 = e^{-\gamma\frac{h}{2}}\mathbf{p}_0 + \sqrt{2\gamma}\int_0^{\frac{h}{2}} e^{-\gamma(\frac{h}{2}-s)}d\mathbf{B}(s) \end{cases}$$

Note that in the implementable Strang's splitting method,  $\phi$  flow can be explicitly integrated and hence  $\mathbf{q}_1, \mathbf{p}_1$  are the same as that in the exact Strang's splitting method.

First, we will bound the deviation of mathematical expectation and mean squared error of  $\mathbf{q}_2(h) - \bar{\mathbf{q}}_2(h)$  and  $\mathbf{p}_2(h) - \bar{\mathbf{p}}_2(h)$ . We have

$$\begin{cases} \mathbf{q}_2(h) - \bar{\mathbf{q}}_2(h) = -\alpha \int_0^h \nabla f(\mathbf{q}_2(s)) - \nabla f(\mathbf{q}_1)ds \\ \mathbf{p}_2(h) - \bar{\mathbf{p}}_2(h) = -\int_0^h \nabla f(\mathbf{q}_2(s)) - \nabla f(\mathbf{q}_1)ds \end{cases} \quad (14)$$

Square both sides of the first equation in (14) and take expectation, we obtain

$$\begin{aligned} \mathbb{E}\|\mathbf{q}_2(h) - \bar{\mathbf{q}}_2(h)\|^2 &= \alpha^2 \mathbb{E}\left\|\int_0^h \nabla f(\mathbf{q}_2(s)) - \nabla f(\mathbf{q}_1)ds\right\|^2 \\ &\leq \alpha^2 \mathbb{E}\left(\int_0^h \|\nabla f(\mathbf{q}_2(s)) - \nabla f(\mathbf{q}_1)\| ds\right)^2 \\ &\leq \alpha^2 L^2 \mathbb{E}\left(\int_0^h \|\mathbf{q}_2(s) - \mathbf{q}_1\| ds\right)^2 \\ &\leq \alpha^2 L^2 h \int_0^h \mathbb{E}\|\mathbf{q}_2(s) - \mathbf{q}_1\|^2 ds \end{aligned}$$

Note that  $\mathbf{q}_2$  is the solution of a rescaled overdamped Langevin dynamics whose drift vector field is  $\alpha L$ -Lipschitz, by conditional expectation version of Lemma D.2, for  $0 < h < \frac{1}{4L'} < \frac{1}{4\alpha L}$ , we have  $\mathbb{E}\|\mathbf{q}_2(h) - \mathbf{q}_1\|^2 \leq \bar{C}_0 h$  with  $\bar{C}_0 = 5.14 \left\{ \alpha d + h(\alpha L)^2 \mathbb{E}\|\mathbf{q}_1\|^2 \right\}$  and it follows that

$$\begin{cases} \mathbb{E}\|\mathbf{q}_2(h) - \bar{\mathbf{q}}_2(h)\|^2 \leq \alpha^2 L^2 \bar{C}_0 h^3 \\ \mathbb{E}\|\mathbf{p}_2(h) - \bar{\mathbf{p}}_2(h)\|^2 \leq L^2 \bar{C}_0 h^3. \end{cases}$$

Now consider  $\mathbf{p}_1$ , i.e., the deviation of mathematical expectation. By Ito's lemma, we have

$$\begin{aligned} &\mathbf{q}_2(h) - \bar{\mathbf{q}}_2(h) \\ &= -\alpha \int_0^h \nabla f(\mathbf{q}_2(s)) - \nabla f(\mathbf{q}_1)ds \\ &= -\alpha \int_0^h \left[ \int_0^s -\alpha \nabla^2 f(\mathbf{q}_2(r)) \nabla f(\mathbf{q}_2(r))dr + \alpha \int_0^s \nabla \Delta f(\mathbf{q}_2(r))dr + \rho \right] ds \quad (15) \end{aligned}$$

where  $\rho$  is a stochastic integral term. Take expectation and norm for Equation (15), we have

$$\begin{aligned}
& \left\| \mathbb{E} [\mathbf{q}_2(h) - \bar{\mathbf{q}}_2(h)] \right\| \\
&= \alpha^2 \left\| \int_0^h \mathbb{E} \left[ \int_0^s \nabla^2 f(\mathbf{q}_2(r)) \nabla f(\mathbf{q}_2(r)) dr - \int_0^s \nabla \Delta f(\mathbf{q}_2(r)) dr \right] ds \right\| \\
&\leq \alpha^2 \int_0^h \mathbb{E} \left[ \int_0^s \|\nabla^2 f(\mathbf{q}_2(r))\|_2 \|\nabla f(\mathbf{q}_2(r))\| dr + \int_0^s \|\nabla \Delta f(\mathbf{q}_2(r))\| dr \right] ds \\
&\leq \alpha^2 \int_0^h \mathbb{E} \left[ L \int_0^s \|\mathbf{q}_2(r)\| dr + \int_0^s G(1 + \|\mathbf{q}_2(r)\|) dr \right] ds \\
&= \alpha^2 (L + G) \int_0^h \int_0^s \mathbb{E} \|\mathbf{q}_2(r)\| dr + \alpha^2 G \frac{h^2}{2} \\
&\leq \alpha^2 (L + G) \int_0^h \int_0^s \mathbb{E} \|\mathbf{q}_2(r) - \mathbf{q}_1\| + \mathbb{E} \|\mathbf{q}_1\| dr + \alpha^2 G \frac{h^2}{2} \\
&\leq \alpha^2 (L + G) \int_0^h \int_0^s \sqrt{\mathbb{E} \|\mathbf{q}_2(r) - \mathbf{q}_1\|^2} + \mathbb{E} \|\mathbf{q}_1\| dr + \alpha^2 G \frac{h^2}{2} \\
&\leq \alpha^2 (L + G) \sqrt{\bar{C}_0 h} \frac{h^2}{2} + \alpha^2 (L + G) \frac{h^2}{2} \mathbb{E} \|\mathbf{q}_1\| + \alpha^2 G \frac{h^2}{2} \\
&\leq \alpha^2 \left\{ \frac{\sqrt{\bar{C}_0 h} + \mathbb{E} \|\mathbf{q}_1\|}{2} (L + G) + \frac{G}{2} \right\} h^2 \\
&\leq \frac{1}{2} \alpha^2 (L + G) \left\{ \sqrt{\bar{C}_0 h} + \mathbb{E} \|\mathbf{q}_1\| + 1 \right\} h^2
\end{aligned}$$

Similarly, we have  $\left\| \mathbb{E} [\mathbf{p}_2(h) - \bar{\mathbf{p}}_2(h)] \right\| \leq \frac{1}{2} \alpha (L + G) \left\{ \sqrt{\bar{C}_0 h} + \mathbb{E} \|\mathbf{q}_1\| + 1 \right\} h^2$ .

For  $p_2$ , i.e., mean-square error, we have

$$\begin{aligned}
\mathbb{E} \|\mathbf{q}_2(h) - \bar{\mathbf{q}}_2(h)\|^2 &\leq \alpha^2 \mathbb{E} \left\{ \int_0^h \|\nabla f(\mathbf{q}_2(s)) - \nabla f(\mathbf{q}_1)\| ds \right\}^2 \\
&\leq \alpha^2 \mathbb{E} \left\{ \int_0^h 1 ds \int_0^h \|\nabla f(\mathbf{q}_2(s)) - \nabla f(\mathbf{q}_1)\|^2 ds \right\} \\
&\leq \alpha^2 L^2 h \int_0^h \mathbb{E} \|\mathbf{q}_2(s) - \mathbf{q}_1\|^2 ds \\
&\leq \frac{\alpha^2 L^2 \bar{C}_0}{2} h^3
\end{aligned}$$

Similarly we obtain  $\mathbb{E} \|\mathbf{p}_2(h) - \bar{\mathbf{p}}_2(h)\|^2 \leq \frac{L^2 \bar{C}_0}{2} h^3$ . Recall

$$\begin{cases} \mathbf{q}_3 - \bar{\mathbf{q}}_3 = \mathbf{q}_2(h) - \bar{\mathbf{q}}_2(h) + \frac{1 - e^{-\gamma \frac{h}{2}}}{\gamma} (\mathbf{p}_2(h) - \bar{\mathbf{p}}_2(h)) \\ \mathbf{p}_3 - \bar{\mathbf{p}}_3 = e^{-\gamma \frac{h}{2}} (\mathbf{p}_2(h) - \bar{\mathbf{p}}_2(h)) \end{cases}$$

and it follows that when  $0 < h \leq \frac{1}{4L'} < 1$

$$\left\| \mathbb{E} \begin{bmatrix} \mathbf{q}_3 - \bar{\mathbf{q}}_3 \\ \mathbf{p}_3 - \bar{\mathbf{p}}_3 \end{bmatrix} \right\| \leq \alpha \left( \alpha + 1 + \frac{h}{2} \right) (L + G) \frac{\sqrt{\bar{C}_0 h} + \mathbb{E} \|\mathbf{q}_1\| + 1}{2} h^2 \quad (16)$$

$$\mathbb{E} \left\| \begin{bmatrix} \mathbf{q}_3 - \bar{\mathbf{q}}_3 \\ \mathbf{p}_3 - \bar{\mathbf{p}}_3 \end{bmatrix} \right\|^2 \leq L^2 \bar{C}_0 \left( \alpha^2 + \frac{1}{2} + \frac{h^2}{4} \right) h^3. \quad (17)$$

Finally we need to bound  $\mathbb{E}\|\mathbf{q}_1\|^2$  by  $\mathbb{E}\|\mathbf{x}_0\|^2$ , to this end, we have

$$\begin{aligned}\mathbb{E}\|\mathbf{q}_1\|^2 &= \mathbb{E}\left\|\mathbf{q}_0 + \frac{1 - e^{-\gamma \frac{h}{2}}}{\gamma} \mathbf{p}_0 + \sqrt{2\gamma} \int_0^{\frac{h}{2}} \frac{1 - e^{-\gamma(\frac{h}{2}-s)}}{\gamma} d\mathbf{B}(s)\right\|^2 \\ &\leq (1 + \frac{h^2}{4})\mathbb{E}\|\mathbf{q}_0\|^2 + (1 + \frac{h^2}{4})\mathbb{E}\|\mathbf{p}_0\|^2 + 2\gamma d \int_0^{\frac{h}{2}} \left(\frac{1 - e^{-\gamma(\frac{h}{2}-s)}}{\gamma}\right)^2 ds \\ &\leq (1 + \frac{h^2}{4})\mathbb{E}\|\mathbf{x}_0\|^2 + \frac{\gamma d}{12} h^3 \tag{18}\end{aligned}$$

$$= (1 + \frac{h^2}{4})\|\mathbf{x}_0\|^2 + \frac{\gamma d}{12} h^3 \tag{19}$$

Collecting all pieces together, including (16), (17), (19), the definition of  $\bar{C}_0$  and  $0 < h < \frac{1}{4L}$ , it is not difficult to obtain the following

$$\begin{aligned}\left\|\mathbb{E}\begin{bmatrix} \mathbf{q}_3 - \bar{\mathbf{q}}_3 \\ \mathbf{p}_3 - \bar{\mathbf{p}}_3 \end{bmatrix}\right\| &\leq \bar{C}_1 h^2 \\ \left(\mathbb{E}\left\|\begin{bmatrix} \mathbf{q}_3 - \bar{\mathbf{q}}_3 \\ \mathbf{p}_3 - \bar{\mathbf{p}}_3 \end{bmatrix}\right\|^2\right)^{\frac{1}{2}} &\leq \bar{C}_2 h^{\frac{3}{2}}\end{aligned}$$

with

$$\bar{C}_1 = \alpha(\alpha + 1.125)(L + G) \left[0.5 + 0.71\|\mathbf{x}_0\| + (1.14\sqrt{\alpha} + 0.21\sqrt{\gamma}h)\sqrt{hd}\right]$$

and

$$\bar{C}_2 = L(\alpha + 0.73) \left(2.30\sqrt{h}\alpha L\|\mathbf{x}_0\| + (2.27\sqrt{\alpha} + 0.12\sqrt{\gamma}h)\sqrt{d}\right)$$

□

## D.7 LOCAL ERROR BETWEEN ALGORITHM 1 AND HFHR DYNAMICS

**Lemma D.8.** Assume  $f$  is  $L$ -smooth,  $\mathbf{0} \in \operatorname{argmin}_{\mathbf{x} \in \mathbb{R}^d} f(\mathbf{x})$ , i.e.  $\nabla f(\mathbf{0}) = \mathbf{0}$  and the operator  $\nabla \Delta f$  grows at most linearly, i.e.  $\|\nabla \Delta f(\mathbf{q})\| \leq G\sqrt{1 + \|\mathbf{q}\|^2}$ . If  $0 < h \leq \frac{1}{4L}$ , then compared with the HFHR dynamics, the implementable Strang's splitting method has local weak error of order  $p_1 = 2$  and local mean-squared error of order  $p_2 = 1.5$ , i.e. there exist constants  $C_1, C_2 > 0$  such that

$$\begin{aligned}\|\mathbb{E}\mathbf{x}(h) - \mathbb{E}\bar{\mathbf{x}}(h)\| &\leq C_1 h^{p_1} \\ \left(\mathbb{E}\left[\|\mathbf{x}(h) - \bar{\mathbf{x}}(h)\|^2\right]\right)^{\frac{1}{2}} &\leq C_2 h^{p_2}\end{aligned}$$

where  $\mathbf{x}(h) = \begin{bmatrix} \mathbf{q}(h) \\ \mathbf{p}(h) \end{bmatrix}$  is the solution of HFHR with initial value  $\mathbf{x}_0 = \begin{bmatrix} \mathbf{q}_0 \\ \mathbf{p}_0 \end{bmatrix}$  and  $\bar{\mathbf{x}}(h) = \begin{bmatrix} \bar{\mathbf{q}}(h) \\ \bar{\mathbf{p}}(h) \end{bmatrix}$  is the solution of the implementable Strang's splitting with initial value  $\mathbf{x}_0 = \begin{bmatrix} \mathbf{q}_0 \\ \mathbf{p}_0 \end{bmatrix}$ ,  $p_1 = 2$  and  $p_2 = 1.5$ . More concretely, we have

$$C_1 = (L+G) \max\{\alpha + 1.25, \gamma + 1\} \left[0.5\alpha + (1.74 + 0.71\alpha)\|\mathbf{x}_0\| + (1.26\sqrt{\alpha} + 1.14\alpha\sqrt{\alpha} + 2.32\sqrt{\gamma})\sqrt{hd}\right]$$

and

$$C_2 = L \max\{\alpha + 1.25, \gamma + 1\} \left[(1.92 + 2.30\alpha L)\sqrt{h}\|\mathbf{x}_0\| + (2.60\sqrt{\alpha} + 3.34\sqrt{\gamma}h)\sqrt{d}\right]$$

*Proof.* Denote by  $\hat{\mathbf{x}}(h) = \begin{bmatrix} \hat{\mathbf{q}}(h) \\ \hat{\mathbf{p}}(h) \end{bmatrix}$  the solution of the exact Strang's splitting method with initial value  $\mathbf{x}_0 = \begin{bmatrix} \mathbf{q}_0 \\ \mathbf{p}_0 \end{bmatrix}$ . By triangle inequality and Minkowski's inequality, we have

$$\begin{aligned} \|\mathbb{E}\mathbf{x}(h) - \mathbb{E}\bar{\mathbf{x}}(h)\| &\leq \|\mathbb{E}\mathbf{x}(h) - \mathbb{E}\hat{\mathbf{x}}(h)\| + \|\mathbb{E}\hat{\mathbf{x}}(h) - \mathbb{E}\bar{\mathbf{x}}(h)\|, \\ \left(\mathbb{E}\|\mathbf{x}(h) - \bar{\mathbf{x}}(h)\|^2\right)^{\frac{1}{2}} &\leq \left(\mathbb{E}\|\mathbf{x}(h) - \hat{\mathbf{x}}(h)\|^2\right)^{\frac{1}{2}} + \left(\mathbb{E}\|\hat{\mathbf{x}}(h) - \bar{\mathbf{x}}(h)\|^2\right)^{\frac{1}{2}}. \end{aligned}$$

By Lemma D.6 and D.7, we have

$$\begin{aligned} \|\mathbb{E}\mathbf{x}(h) - \mathbb{E}\hat{\mathbf{x}}(h)\| &\leq \hat{C}_1 h^2, \quad \|\mathbb{E}\hat{\mathbf{x}}(h) - \mathbb{E}\bar{\mathbf{x}}(h)\| \leq \bar{C}_1 h^2 \\ \left(\mathbb{E}\|\mathbf{x}(h) - \hat{\mathbf{x}}(h)\|^2\right)^{\frac{1}{2}} &\leq \hat{C}_2 h^{\frac{3}{2}}, \quad \left(\mathbb{E}\|\hat{\mathbf{x}}(h) - \bar{\mathbf{x}}(h)\|^2\right)^{\frac{1}{2}} \leq \bar{C}_2 h^{\frac{3}{2}} \end{aligned}$$

and hence

$$\begin{aligned} \|\mathbb{E}\mathbf{x}(h) - \mathbb{E}\bar{\mathbf{x}}(h)\| &\leq (\hat{C}_1 + \bar{C}_1) h^2 \\ \left(\mathbb{E}\|\mathbf{x}(h) - \bar{\mathbf{x}}(h)\|^2\right)^{\frac{1}{2}} &\leq (\hat{C}_2 + \bar{C}_2) h^{\frac{3}{2}} \end{aligned}$$

with

$$\hat{C}_1 + \bar{C}_1 \leq C_1$$

$$\triangleq (L + G) \max\{\alpha + 1.25, \gamma + 1\} \left[ 0.5\alpha + (1.74 + 0.71\alpha)\|\mathbf{x}_0\| + (1.26\sqrt{\alpha} + 1.14\alpha\sqrt{\alpha} + 2.32\sqrt{\gamma})\sqrt{hd} \right]$$

$$\hat{C}_2 + \bar{C}_2 \leq C_2 \triangleq L \max\{\alpha + 1.25, \gamma + 1\} \left[ (1.92 + 2.30\alpha L)\sqrt{h}\|\mathbf{x}_0\| + (2.60\sqrt{\alpha} + 3.34\sqrt{\gamma}h)\sqrt{d} \right]$$

□

## E $\alpha$ DOES CREATE ACCELERATION EVEN AFTER DISCRETIZATION: AN ANALYTICAL DEMONSTRATION

If  $\alpha \rightarrow \infty$  while  $\gamma$  remains fixed, then  $dq = -\alpha \nabla f(q) + \sqrt{2\alpha} dW$  is the dominant part of the dynamics, and in this case the role of  $\alpha$  could be intuitively understood as to simply rescale the time of gradient flow, which does not create any algorithmic advantage, as the timestep of discretization has to scale like  $1/\alpha$  in this case. However, finite  $\alpha$  no longer corresponds to solely a time-scaling, but closely couples with the dynamics and creates acceleration. This is true even after the continuous dynamics is discretized by an algorithm.

We will analytically illustrate this point by considering quadratic  $f$ . In this case, the diffusion process remains Gaussian, and it suffices to quantify the convergence of its mean and covariance. In fact, it can be shown that both have the same speed of convergence, and therefore for simplicity we will only consider the mean process. Two demonstrations (with different focuses) will be provided.

**Demonstration 1 (1D,  $\gamma$  given; infinite acceleration).** Consider  $f(x) = x^2/2$ ,  $\gamma$  fixed. The mean process is

$$\begin{cases} \dot{q} &= p - \alpha q \\ \dot{p} &= -q - \gamma p \end{cases}$$

Consider, for simplicity, an Euler-Maruyama discretization of the HFHR dynamics, which corresponds to a Forward Euler discretization of the mean process (other numerical methods can be analyzed analogously):

$$\begin{bmatrix} q_{k+1} \\ p_{k+1} \end{bmatrix} = A \begin{bmatrix} q_k \\ p_k \end{bmatrix}, \quad A = \begin{bmatrix} 1 - \alpha h & h \\ -h & 1 - \gamma h \end{bmatrix}.$$

We will show that, unless  $\gamma = 2$ , an appropriately chosen  $\alpha$  will converge infinitely faster than the case with  $\alpha = 0$ , if both cases use the optimal  $h$ .

To do so, let us compute  $A$ 's eigenvalues, which are

$$\frac{1}{2} \left( 2 - (\alpha + \gamma)h \pm h\sqrt{-4 + (\alpha - \gamma)^2} \right)$$

Consider the case where  $|\alpha - \gamma| \leq 2$ , then the eigenvalues are a pair of complex conjugates. Their modulus determines the speed of convergence, and it can be computed to be

$$\frac{1}{2} \sqrt{(2 - (\alpha + \gamma)h)^2 + h^2(4 - (\alpha - \gamma)^2)} = \sqrt{1 - (\alpha + \gamma)h + (1 + \alpha\gamma)h^2}$$

Minimizing the quadratic function gives the optimal  $h$  that ensures the fastest speed of convergence, and the optimal  $h$  is

$$h = \frac{\alpha + \gamma}{2(1 + \alpha\gamma)}$$

and the optimal spectral radius is

$$\sqrt{1 - \frac{(\alpha + \gamma)^2}{4(1 + \alpha\gamma)}}.$$

When one uses low-resolution ODE, in which  $\alpha = 0$ , the optimal rate is  $1 - \gamma^2/4$  (note it is not surprising that the critically damped case, i.e.,  $\gamma = 2$ , will give the fastest convergence).

If  $\gamma \neq 2$ , the additional introduction of  $\alpha$  can accelerate the convergence by reducing the spectral radius. For instance, if  $\alpha = \gamma + 2$ , upon choosing the optimal  $h = \frac{1}{1+\gamma}$ , the optimal spectral radius is 0 (note in this case  $A$  actually has Jordan canonical form of  $\begin{bmatrix} 0 & 1 \\ 0 & 0 \end{bmatrix}$  and thus the discretization converges in 2 steps instead of 1, irrespective of the initial condition).

**Demonstration 2 (multi-dim,  $\gamma$ ,  $\alpha$  and  $h$  all to be chosen; acceleration quantified in terms of condition number).** Consider quadratic  $f$  with positive definite Hessian, whose eigenvalues are  $1 = \lambda_1 < \dots < \lambda_n = \epsilon^{-1}$  for some  $0 < \epsilon \ll 1$ . Assume without loss of generality that  $f = q_1^2/2 + \epsilon^{-1}q_2^2/2$ . Similar to Demonstration 1, the forward Euler discretization of the mean process is

$$\begin{bmatrix} q_{1,k+1} \\ p_{1,k+1} \\ q_{2,k+1} \\ p_{2,k+1} \end{bmatrix} = \begin{bmatrix} A_1 & 0 \\ 0 & A_2 \end{bmatrix} \begin{bmatrix} q_{1,k} \\ p_{1,k} \\ q_{2,k} \\ p_{2,k} \end{bmatrix}, \quad A_1 = \begin{bmatrix} 1 - \alpha h & h \\ -h & 1 - \gamma h \end{bmatrix}, \quad A_2 = \begin{bmatrix} 1 - \alpha\epsilon^{-1}h & h \\ -\epsilon^{-1}h & 1 - \gamma h \end{bmatrix} \quad (20)$$

We will (i) find  $h$  and  $\gamma$  that lead to fastest convergence of the ULD discretization, i.e. the above iteration with  $\alpha = 0$ , and then (ii) constructively show the existence of  $h$ ,  $\gamma$  and  $\alpha$  that lead to faster convergence than the optimal one in (i) — note these may not even be the optimal choices for HFHR, but they already lead to significant acceleration. More specifically,

**(i)** In a ULD setup,  $\alpha = 0$ . It can be computed that the eigenvalues of  $A_1$  and  $A_2$  are respectively

$$\frac{1}{2} \left( 2 - h\gamma \pm h\sqrt{-4 + \gamma^2} \right) \quad \text{and} \quad \frac{1}{2} \left( 2 - h\gamma \pm h\sqrt{-4\epsilon^{-1} + \gamma^2} \right)$$

We now seek  $\gamma > 0, h > 0$  to minimize the maximum of their norms for obtaining the optimal convergence rate. This is done in cases.

**Case (i1)** When  $\gamma \leq 2$ , both  $A_1$  and  $A_2$  eigenvalues are complex conjugate pairs. To minimize the maximum of their norms, let's first see if their norms could be made equal.

$A_1$  eigenvalue's norm squared  $\times 4$  is

$$(2 - h\gamma)^2 - h^2(-4 + \gamma^2) = 4(h - \gamma/2)^2 + 4 - \gamma^2 \quad (21)$$

$A_2$  eigenvalue's norm squared  $\times 4$  is

$$(2 - h\gamma)^2 - h^2(-4\epsilon^{-1} + \gamma^2) = 4\epsilon^{-1}(h - \epsilon\gamma/2)^2 + 4 - \epsilon\gamma^2 \quad (22)$$

It can be seen that for (21) is always strictly smaller than (22) for any  $h > 0$ . Therefore, the max of the two is minimized when  $h = \epsilon\gamma/2$ , and the corresponding max value is  $4 - \epsilon\gamma^2$ .  $\gamma$  that minimizes this max value is  $\gamma = 2$ . Corresponding rate of convergence is

$$\sqrt{1 - \epsilon}.$$

Case (i2) When  $\gamma \geq 2\epsilon^{-1/2}$ , both  $A_1$  and  $A_2$  eigenvalues are real. Since  $\epsilon \ll 1$ , we can order them  $\times 2$  as

$$2 - h\gamma - h\sqrt{-4 + \gamma^2} < 2 - h\gamma - h\sqrt{-4\epsilon^{-1} + \gamma^2} < 2 - h\gamma + h\sqrt{-4\epsilon^{-1} + \gamma^2} < 2 - h\gamma + h\sqrt{-4 + \gamma^2} < 2.$$

To minimize the max of their norms, consider cases in which the smallest of four is negative, in which case at optimum one should have

$$-(2 - h\gamma - h\sqrt{-4 + \gamma^2}) = 2 - h\gamma + h\sqrt{-4 + \gamma^2}.$$

This gives  $h = 2/\gamma$  (which does verify the assumption that the smallest of four is negative). Corresponding max of their norms is thus  $\sqrt{1 - 4/\gamma^2}$ .  $\gamma$  that minimizes this max value is  $\gamma = 2\epsilon^{-1/2}$ , which gives rate of convergence of

$$\sqrt{1 - \epsilon}.$$

Case (i3) When  $2 \leq \gamma \leq 2\epsilon^{-1/2}$ ,  $A_1$  eigenvalues are real and  $A_2$  eigenvalues are complex conjugates. Again, the max of their norms is minimized if the norms can be made all equal.

Note  $A_1$  eigenvalues cannot be of the same sign, because otherwise  $2 - h\gamma - h\sqrt{-4 + \gamma^2} = 2 - h\gamma + h\sqrt{-4 + \gamma^2}$ , which means either  $h = 0$  or  $\gamma = 2$ , but if  $\gamma = 2$  then  $2 - h\gamma + h\sqrt{-4 + \gamma^2}$  being equal to 2\*norm of  $A_2$  eigenvalue, which is  $\sqrt{4\epsilon^{-1}(h - \epsilon\gamma/2)^2 + 4 - \epsilon\gamma^2}$ , leads to  $h = 0$  again.

Therefore, the equality of norms of  $A_1, A_2$  eigenvalues means

$$-(2 - h\gamma - h\sqrt{-4 + \gamma^2}) = 2 - h\gamma + h\sqrt{-4 + \gamma^2} = \sqrt{4\epsilon^{-1}(h - \epsilon\gamma/2)^2 + 4 - \epsilon\gamma^2}.$$

The first equality gives  $h\gamma = 2$ , which, together with the second equality, gives  $h = \pm\sqrt{\frac{2\epsilon}{1+\epsilon}}$ . Selecting the positive value of optimal  $h$ , we also obtain optimal  $\gamma = \sqrt{2(1+\epsilon)}\epsilon^{-1/2}$ , which is  $\leq 2\epsilon^{-1/2}$  and thus satisfying our assumption ( $2 \leq \gamma \leq 2\epsilon^{-1/2}$ ). The corresponding rate of convergence is thus

$$\frac{1}{2} \left( 2 - h\gamma + h\sqrt{-4 + \gamma^2} \right) = \sqrt{\frac{1 - \epsilon}{1 + \epsilon}}.$$

Summary of (i) Since  $\sqrt{\frac{1-\epsilon}{1+\epsilon}} < \sqrt{1-\epsilon}$ , the ULD Euler-Maruyama discretization converges the fastest when

$$h = \sqrt{\frac{2\epsilon}{1+\epsilon}}, \quad \gamma = \sqrt{2(1+\epsilon)}\epsilon^{-1/2},$$

and the corresponding discount factor of convergence (i.e. base of exponential convergence) is

$$\sqrt{\frac{1 - \epsilon}{1 + \epsilon}}, \quad \text{where } \epsilon = 1/\kappa \text{ with } \kappa \text{ being Hessian's condition number.} \quad (23)$$

(ii) Now consider the HFHR setup. Let's first state a result: when

$$\gamma = \frac{\sqrt{4c^2\epsilon^4 + 8c^2\epsilon^3 + 4c^2\epsilon^2 + \epsilon^2 - 2\epsilon + 1} + \epsilon + 3}{2c\epsilon^2 + 2c\epsilon} > 0, \quad (24)$$

$$\alpha = \frac{-\sqrt{4c^2\epsilon^4 + 8c^2\epsilon^3 + 4c^2\epsilon^2 + \epsilon^2 - 2\epsilon + 1} + 3\epsilon + 1}{2c\epsilon^2 + 2c\epsilon} > 0, \quad h = c\epsilon \quad (25)$$

for any  $c > 0$  independent of  $\epsilon$ , the iteration (20) converges with discount factor

$$\frac{1}{\sqrt{2(1+\epsilon)}} \sqrt{(1-\epsilon) \left( 1 - \epsilon + \sqrt{4c^2\epsilon^4 + 8c^2\epsilon^3 + (4c^2 + 1)\epsilon^2 - 2\epsilon + 1} \right)}. \quad (26)$$

While the exact expression is lengthy, it can be proved that the HFHR non-optimal discount factor (26) is strictly smaller than the ULD optimal discount factor (23) for not only small but also large  $\epsilon$ 's.

For some quantitative intuition, discount factors respectively have the following Taylor expansions in  $\epsilon$ :

$$\text{HFHR non-optimal:} \quad 1 - 2\epsilon + \left(\frac{c^2}{2} + 2\right)\epsilon^2 + \mathcal{O}(\epsilon^3) \quad (27)$$

$$\text{ULD optimal:} \quad 1 - \epsilon + \frac{\epsilon^2}{2} + \mathcal{O}(\epsilon^3) \quad (28)$$

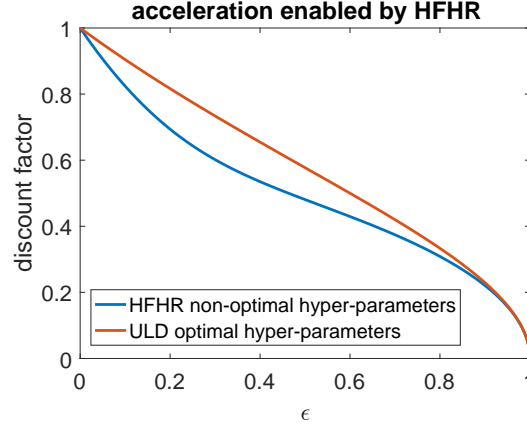

Figure 4: Acceleration of HFHR algorithm over ULD algorithm (despite of an additional constraint  $\alpha$  may place on  $h$ ) for multi-dimensional quadratic objectives.  $1/\epsilon$  is the condition number.

The exact expressions of discount factors are also plotted in Fig.4 ( $c = 1$  was arbitrarily chosen) and one can see acceleration for any (not necessarily small)  $\epsilon$ .

**(ii details)** How were values in (25) chosen? Following the idea detailed in (i), we consider a case where  $A_1$  eigenvalues are both real,  $A_2$  eigenvalues are complex conjugates, and all their norms are equal. Note there are 3 more cases, namely real/real, complex/real, and complex/complex, but we do not optimize over all cases for simplicity — the real/complex case is enough for outperforming the optimal ULD.

This case leads to at least the following equations

$$\begin{cases} \text{tr} A_1 &= 0 \\ \det A_1 + \det A_2 &= 0 \end{cases} \quad (29)$$

One can solve this system of equations to obtain  $\alpha$  and  $\gamma$  as functions of  $h$ . Following the idea of choosing  $h$  small enough to resolve the stiffness of the ODE

$$\begin{cases} \dot{q}_2 &= p_2 - \alpha\epsilon^{-1}q_2 \\ \dot{p}_2 &= -\epsilon^{-1}q_2 - \gamma p_2 \end{cases},$$

pick  $h = c\epsilon$ . Then (29) gives

$$\begin{aligned} \gamma &= \frac{\sqrt{4c^2\epsilon^4 + 8c^2\epsilon^3 + 4c^2\epsilon^2 + \epsilon^2 - 2\epsilon + 1} + \epsilon + 3}{2c\epsilon^2 + 2c\epsilon} \\ \alpha &= \frac{-\sqrt{4c^2\epsilon^4 + 8c^2\epsilon^3 + 4c^2\epsilon^2 + \epsilon^2 - 2\epsilon + 1} + 3\epsilon + 1}{2c\epsilon^2 + 2c\epsilon} \end{aligned}$$

or

$$\begin{aligned} \gamma &= \frac{-\sqrt{4c^2\epsilon^4 + 8c^2\epsilon^3 + 4c^2\epsilon^2 + \epsilon^2 - 2\epsilon + 1} + \epsilon + 3}{2c\epsilon^2 + 2c\epsilon} \\ \alpha &= \frac{\sqrt{4c^2\epsilon^4 + 8c^2\epsilon^3 + 4c^2\epsilon^2 + \epsilon^2 - 2\epsilon + 1} + 3\epsilon + 1}{2c\epsilon^2 + 2c\epsilon} \end{aligned}$$



The former is our choice (25) because it can be checked that the latter leads to  $\det A_1 > 0$  which violates the assumption of a pair of plus and minus real eigenvalues.

It is possible to find optimal  $\alpha, \gamma, h$  for HFHR for the Gaussian cases. One has to minimize  $\det A_2$  under the constraint  $\det A_2 > 0$  in addition to (29). And then do similar calculations for the other 3 cases, and then finally the best among the 4 cases. Doing so however does not give enough insights to determine optimal hyperparameters for sampling general distributions.

## F RANDOMIZED MIDPOINT DISCRETIZATION OF HFHR

### F.1 THE ALGORITHM

HFHR is based on a continuous dynamics that adds HFHR corrections to the Underdamped Langevin Dynamics (ULD). It can be turned into a sampling algorithm via either a low-order time discretization (e.g., HFHR Algorithm 1) or a more accurate one. To complement the main text, this section demonstrates the latter, based on a powerful recent progress in discretizing ULD, known as Randomized Midpoint Algorithm (RMA) (Shen & Lee, 2019), and shows that the acceleration created by the HFHR correction terms persists.

More specifically, RMA is a high-order discretization scheme for ULD that achieved a better  $\mathcal{O}(d^{\frac{1}{3}})$  dimension dependence of mixing time than first-order discretization of ULD, e.g., 1st-order KLMC (Dalalyan & Riou-Durand, 2020). Although RMA is originally designed specifically for ULD only, it is a general idea and already adapted to overdamped Langevin (He et al., 2020). Here we show it can be easily adapted to HFHR as well, as illustrated by the following Algorithm 2. Red highlights algorithmic changes we made to account for the HFHR corrections of ULD.

---

**Algorithm 2** Randomized Midpoint Algorithm from Shen & Lee (2019), adapted for HFHR

---

```

1: Input: potential function  $f$  and its gradient  $\nabla f$ , damping coefficients  $\alpha$  and  $\gamma$ , step size  $h$ ,
   initial condition  $(\mathbf{q}_0, \mathbf{p}_0)$ 
2: procedure RMA-HFHR( $f, \nabla f, \alpha, \gamma, h, \mathbf{q}_0, \mathbf{p}_0$ )
3:    $k = 0$  and initialize  $\begin{bmatrix} \mathbf{q}_0 \\ \mathbf{p}_0 \end{bmatrix}$ 
4:   while not converged do
5:     Generate an independent uniform random variable  $\theta_k \sim U(0, 1)$ 
6:     Generate Gaussian random vectors  $(\mathbf{W}_{k+1}^1, \mathbf{W}_{k+1}^2, \mathbf{W}_{k+1}^3) \in \mathbb{R}^{3d}$  as in (Shen & Lee,
       2019, Appendix A)
7:     Generate Gaussian random vectors  $\mathbf{B}_{k+1}^1, \mathbf{B}_{k+1}^2 \in \mathbb{R}^d$  as described by (31)
8:      $\mathbf{q}_{k+\frac{1}{2}} = \mathbf{q}_k + \frac{1}{\gamma}(1 - e^{-\gamma\theta_k h})\mathbf{p}_k - \frac{1}{\gamma}(\theta_k h - \frac{1}{\gamma}(1 - e^{-\gamma\theta_k h}))\nabla f(\mathbf{q}_k) + \mathbf{W}_{k+1}^1$ 
        $-\alpha\theta_k h\nabla f(\mathbf{q}_k) + \sqrt{2\alpha}\mathbf{B}_{k+1}^1$ 
9:      $\mathbf{q}_{k+1} = \mathbf{q}_k + \frac{1}{\gamma}(1 - e^{-\gamma h})\mathbf{p}_k - \frac{1}{\gamma}h(1 - e^{-\gamma(h-\theta_k h)})\nabla f(\mathbf{q}_{k+\frac{1}{2}}) + \mathbf{W}_{k+1}^2 -$ 
        $\alpha h\nabla f(\mathbf{q}_{k+\frac{1}{2}}) + \sqrt{2\alpha}(\mathbf{B}_{k+1}^1 + \mathbf{B}_{k+1}^2)$ 
10:     $\mathbf{p}_{k+1} = \mathbf{p}_k e^{-\gamma h} - h e^{-\gamma(h-\theta_k h)}\nabla f(\mathbf{q}_{k+\frac{1}{2}}) + 2\mathbf{W}_{k+1}^3$ 
11:     $k \leftarrow k + 1$ 
12:  end while
13: end procedure
```

---

The red parts basically correspond to two Euler-Maruyama time-steppings of an auxiliary dynamics that contains only the HFHR correction terms

$$d\mathbf{q} = -\alpha\nabla f(\mathbf{q})dt + \sqrt{2\alpha}d\mathbf{B}_t, \quad (30)$$

first over a  $\theta_k h$  timestep, and then over an  $h$  timestep. These two steps originate from an operator splitting treatment of the full HFHR dynamics (eq.6), which is split into ULD and (30). Therefore, it is natural to see that

$$\mathbf{B}_{k+1}^1 = \int_{hk}^{h(k+\theta_k)} d\mathbf{B}_t, \quad \mathbf{B}_{k+1}^2 = \int_{h(k+\theta_k)}^{h(k+1)} d\mathbf{B}_t,$$

and therefore  $B_{k+1}^1$  and  $B_{k+1}^2$  are, when conditioned on  $\theta_k$ , centered Gaussian vectors independent from each other and the  $W$ 's, each being  $d$ -dimensional with i.i.d. entries, and they can be generated via

$$B_{k+1}^1 = \sqrt{\theta_k h} \xi_{k+1}^1, \quad B_{k+1}^2 = \sqrt{h - \theta_k h} \xi_{k+1}^2, \quad (31)$$

where  $\xi_{k+1}^1$  and  $\xi_{k+1}^2$  are i.i.d. standard  $d$ -dimensional Gaussian vectors.

**Remark F.1.** In the original RMA (Shen & Lee, 2019, Algorithm 1), the uniform random variable for the midpoint's proportional location was denoted by  $\alpha$ . However, since we have already used this letter for the HFHR correction coefficient, we use instead  $\theta$  to denote this uniform random variable.

**Remark F.2.** From the red text, it is easy to see that if  $\alpha = 0$ , Algorithm 2 degenerates to RMA for ULD. Nevertheless, Algorithm 2 is again just one RMA discretization of HFHR but not the only one.

## F.2 NUMERICAL RESULTS: HFHR AGAIN ACCELERATES

To numerically compare the RMA discretization of HFHR dynamics and ULD dynamics (note we don't compare 1st-order HFHR Algorithm 1 with RMA-ULD as we'd like to compare apple with apple), we conduct an experiment very similar to that in Sec.6.1, with the same nonlinear potential function. We run both RMA for ULD and RMA for HFHR with dimension  $d = 10$ , initial value  $(100 \times \mathbf{1}_d, \mathbf{0}_d)$ ,  $h = 1$  (chosen to be near the stability limit of RMA-ULD), a family of  $\gamma \in \{0.1, 0.2, 0.5, 1, 2, 5, 10, 20, 50, 100\}$  and  $\alpha \in \{0, 0.001, 0.002, 0.005, 0.01, 0.02, 0.05, 0.1, 0.2, 0.5, 0.55, 0.6, 0.65, 0.7, 0.75, 0.8, 0.85, 0.9, 0.95, 1, 2, 5, 10, 20, 50, 100\}$ . For each algorithm and each set of parameter values, we run 1,000 independent realizations to compute statistics and estimate the mean time of reaching  $\varepsilon = 0.1$  neighborhood of the target distribution. Then, for each  $\alpha$  (including  $\alpha = 0$ , which is the original RMA), we optimize over  $\gamma$  choices to get the best results. To further reduce variance, we also repeat the experiment with 100 different random seeds.

Too large  $\alpha$  values with which Algorithm 2 fails to reach  $\varepsilon$ -neighborhood are not plotted and the final results are shown in Figure 5. It clearly suggests that with appropriated chosen  $\alpha$  ( $\alpha = 0.5$  in our case), RMA discretized HFHR dynamics requires fewer iterations than RMA discretized ULD, which suggests a better iteration complexity.

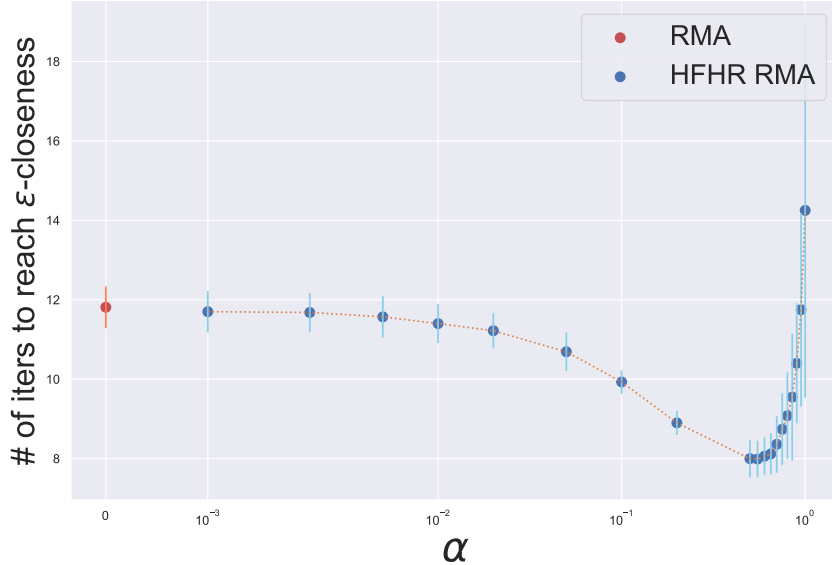

Figure 5: Improvement of RMA for HFHR (Algorithm 2) over the original RMA (for ULD) in iteration complexity. (vertical bar = 1 std.)
